# Supplementary material
Source: publisher site journal article supplement (https://www.dovepress.com/article/416778)
Supplement: Supplementary file 1 [file get_supplementary_file.php]

**Supplementary material**

**Supplementary Table S1.** The forty-five autoimmune diseases included in overall autoimmune disease

**Supplementary Table S2.** The sources and corresponding information on exposures and outcomes

**Supplementary Table S3.** Excluded SNPs and the reasons for removing these SNPs

**Supplementary Table S4.** Details of instrument variables used for systemic lupus erythematosus in the discovery sample

**Supplementary Table S5.** Details of instrument variables used for rheumatoid arthritis in the discovery sample

**Supplementary Table S6.** Details of instrument variables used for inflammatory bowel disease in the discovery sample

**Supplementary Table S7.** Details of instrument variables used for multiple sclerosis in the discovery sample

**Supplementary Table S8.** Details of instrument variables used for type 1 diabetes in the discovery sample

**Supplementary Table S9.** Details of instrument variables used for overall autoimmune disease

**Supplementary Table S10.** Results of tests for pleiotropy and heterogeneity

**Supplementary Table S11.** MR analysis of associations between five autoimmune diseases and appendicular lean mass in replication samples

**Supplementary Table S12.** MR analysis of associations between five autoimmune diseases and low grip strength in replication samples

**Supplementary Table S13.** MR analysis of associations between five autoimmune diseases and walking pace in replication samples

**Supplementary Table S14.** Details of instrument variables used for appendicular lean mass in reverse MR analyses

**Supplementary Table S15.** Details of instrument variables used for low grip strength in reverse MR analyses

**Supplementary Table S16.** Details of instrument variables used for walking pace in reverse MR analyses

**Supplementary Table S17.** Results of reverse MR analyses

**Supplementary Figure S1.** The scatter plot for MR analysis of autoimmune diseases and appendicular lean mass

**Supplementary Figure S2.** The scatter plot for MR analysis of autoimmune diseases and low grip strength

**Supplementary Figure S3.** The scatter plot for MR analysis of autoimmune diseases and walking pace

| **Supplementary Table S1.** The forty-five autoimmune diseases included in overall autoimmune disease |
| --- |
| Diseases |
| Rheumatoid arthritis |
| Systemic lupus erythematosus |
| Multiple Sclerosis |
| Type 1 diabetes |
| Inflammatory bowel disease |
| Relapsing polychondritis |
| Sicca syndrome |
| Systemic sclerosis |
| Dermatopolymyositis |
| Wegener granulomatosis |
| Microscopic polyangiitis |
| Polyarteritis with lung involvement |
| Allergic purpura |
| Rheumatic fever incl heart disease |
| Hypothyroidism, strict autoimmune |
| Acute disseminated encephalitis/encephalomyelitis |
| Other acute disseminated demyelination |
| Narcolepsy and cataplexy |
| Autoimmune hyperthyroidism |
| Autoimmune thyroiditis |
| Autoimmune polyglandular failure |
| Autoimmune hepatitis |
| Drug-induced autoimmune haemolytic anaemia |
| Other autoimmune haemolytic anaemias |
| Myasthenia gravis |
| Other demyelinating diseases of the central nervous system |
| Disorders of myoneural junction and muscle in diseases classified elsewhere |
| Coeliac disease |
| Primary biliary cholangitis |
| Guillain-Barre syndrome |
| Psoriasis |
| Vitiligo |
| Alopecia areata |
| Idiopathic thrombocytopenic purpura |
| Henoch-Schönlein purpura nephritis (HSPN) |
| Adrenocortical insufficiency |
| Hypersensitivity angiitis |
| IgA nephropathy (IgA glomerulonephritis) |
| Vitamin B12 deficiency anaemia |
| Anterior Iridocyclitis |
| Graves ophthalmopathy, strict |
| Bechet disease |
| Pemphigoid |
| Dermatitis herpetiformis |
| Mixed connective tissue disease |

| **Supplementary Table S2.** The sources and corresponding information on exposures and outcomes | | | |
| --- | --- | --- | --- |
| Traits | Population | Sample size | Consortium |
| SLE (discovery) | European | 5,201 cases/9,066 controls | Bentham et al./PMID: 26502338 |
| RA (discovery) | European | 14,361 cases/43,923 controls | Okada et al./PMID: 24390342 |
| IBD (discovery) | European | 12,882 cases/21,770 controls | Liu et al./PMID: 26192919 |
| MS (discovery) | European | 14,498 cases/24,091 controls | IMSGC/PMID: 24076602 |
| T1D (discovery) | European | 6,683 cases/12,173 controls | Onengut-Gumuscu et al./PMID: 25751624 |
| Overall autoimmune disease | European | 42,202 cases/176,590 controls | FinnGen/GWAS ID: finn-b-AUTOIMMUNE |
| SLE (replication) | European | 538 cases/213,145 controls | FinnGen/GWAS ID: finn-b-M13_SLE |
| RA (replication) | European | 6,236 cases/147,221 controls | FinnGen/GWAS ID: finn-b-M13_RHEUMA |
| IBD (replication) | European | 3,753 cases/210,300 controls | FinnGen/GWAS ID: finn-b-K11_IBD_STRICT |
| MS (replication) | European | 1,048 cases/217,141 controls | FinnGen/GWAS ID: finn-b-G6_MS |
| T1D (replication) | European | 2,542 cases/182,573 controls | FinnGen/GWAS ID: finn-b-T1D_STRICT |
| ALM | European | 450,243 | UK Biobank/PMID: 33097823 |
| Low grip strength | European | 48,596 cases/207,927 controls | Jones et al./PMID: 33510174 |
| walking pace | European | 459,915 | UK Biobank/GWAS ID: ukb-b-4711 |
| Abbreviations: SLE, systemic lupus erythematosus; RA, rheumatoid arthritis; MS, multiple sclerosis; IBD, inflammatory bowel disease; T1D, type 1 diabetes; ALM, appendicular lean mass; IMSGC, International MS Genetics Consortium. | | | |

| **Supplementary Table S3.** Excluded SNPs and the reasons for removing these SNPs | | |
| --- | --- | --- |
| Traits | Excluded SNPs | Reasons for exclusion |
| SLE | rs6679677 | Associated with RA, etc. |
| SLE | rs6671847 | Associated with IBD |
| SLE | rs4916215 | Associated with RA |
| SLE | rs10200680 | Associated with Leg fat-free mass, etc. |
| SLE | rs4274624 | Associated with RA, etc. |
| SLE | rs2431697 | Associated with psoriasis |
| SLE | rs6889239 | Associated with myasthenia gravis |
| SLE | rs389884 | Associated with T1D, etc. |
| SLE | rs12524498 | Associated with RA |
| SLE | rs58721818 | Associated with RA |
| SLE | rs150180633 | Associated with primary sclerosing cholangitis |
| SLE | rs35000415 | Associated with RA |
| SLE | rs2736332 | Associated with RA, etc. |
| SLE | rs7899626 | Associated with RA, etc. |
| SLE | rs353608 | Associated with heel bone mineral density |
| SLE | rs597808 | Associated with hypothyroidism, etc. |
| SLE | rs35251378 | Associated with RA, etc. |
| SLE | rs3747093 | Associated with IBD |
| SLE | rs28834423 | Palindromic SNP |
| SLE | rs9274357 | SNP with inconsistent alleles (T/C vs C/G) |
| SLE | rs28361029 | Not present in any of the three sarcopenia-related trait datasets |
| RA | rs6679677 | Associated with T1D, etc. |
| RA | rs2235924 | Associated with height |
| RA | rs12126142 | Associated with coronary artery disease |
| RA | rs3087243 | Associated with hypothyroidism, etc. |
| RA | rs11889341 | Associated with SLE, etc. |
| RA | rs3806624 | Associated with Hodgkin’s lymphoma |
| RA | rs11933540 | Associated with hypothyroidism |
| RA | rs2561477 | Associated with hypothyroidism |
| RA | rs7731626 | Associated with pediatric autoimmune diseases |
| RA | rs9277956 | Associated with hypothyroidism, etc. |
| RA | rs9277411 | Associated with primary biliary cholangitis, etc. |
| RA | rs9296009 | Associated with primary sclerosing cholangitis, etc. |
| RA | rs2858329 | Associated with ulcerative colitis |
| RA | rs7754520 | Associated with hypothyroidism, etc. |
| RA | rs1571878 | Associated with hypothyroidism |
| RA | rs3778753 | Associated with primary biliary cirrhosis |
| RA | rs2736337 | Associated with heel bone mineral density, etc. |
| RA | rs1953126 | Associated with celiac disease |
| RA | rs947474 | Associated with T1D, etc. |
| RA | rs706778 | Associated with primary sclerosing cholangitis, etc. |
| RA | rs71508903 | Associated with vitiligo, etc. |
| RA | rs4409785 | Associated with vitiligo, etc. |
| RA | rs773125 | Associated with arm fat-free mass, etc. |
| RA | rs3784099 | Associated with height, etc. |
| RA | rs8026898 | Associated with height |
| RA | rs8032939 | Associated with hypothyroidism |
| RA | rs9747973 | Associated with ulcerative colitis |
| RA | rs8083786 | Associated with Crohn’s disease |
| RA | rs74956615 | Associated with hypothyroidism |
| RA | rs1893592 | Associated with primary sclerosing cholangitis, etc. |
| RA | rs909685 | Associated with weight |
| RA | rs13330176 | Palindromic SNP |
| RA | rs141202333 | Palindromic SNP |
| RA | rs168962 | Palindromic SNP |
| IBD | rs11209026 | Associated with ankylosing spondylitis, etc. |
| IBD | rs3024493 | Associated with T1D |
| IBD | rs7523335 | Associated with whole body fat-free mass |
| IBD | rs112694524 | Associated with type II diabetes |
| IBD | rs11677953 | Associated with height |
| IBD | rs1873625 | Associated with body mass index, etc. |
| IBD | rs35260072 | Associated with hand grip strength, etc. |
| IBD | rs10045431 | Associated with psoriasis, etc. |
| IBD | rs4712528 | Associated with psoriasis vulgaris |
| IBD | rs148844907 | Associated with hypothyroidism, etc. |
| IBD | rs6927172 | Associated with RA, etc. |
| IBD | rs444210 | Associated with RA, etc. |
| IBD | rs9272514 | Associated with RA |
| IBD | rs4077515 | Associated with IgA nephropathy |
| IBD | rs1887428 | Associated with SLE, etc. |
| IBD | rs4246905 | Associated with pediatric autoimmune diseases |
| IBD | rs10761659 | Associated with irritable bowel syndrome |
| IBD | rs6584283 | Associated with hypothyroidism, etc. |
| IBD | rs11236797 | Associated with number of self-reported non-cancer illnesses |
| IBD | rs56062135 | Associated with coronary artery disease, etc. |
| IBD | rs12446550 | Associated with hip circumference, etc. |
| IBD | rs2076756 | Associated with irritable bowel syndrome |
| IBD | rs12936409 | Associated with RA, etc. |
| IBD | rs744166 | Associated with MS, etc. |
| IBD | rs2542147 | Associated with RA |
| IBD | rs6062496 | Associated with smoking |
| IBD | rs2836882 | Associated with primary sclerosing cholangitis, etc. |
| IBD | rs1003342 | Associated with arm fat-free mass, etc. |
| IBD | rs113991740 | Palindromic SNP |
| IBD | rs131657 | Palindromic SNP |
| IBD | rs13178036 | Palindromic SNP |
| IBD | rs35730213 | Palindromic SNP |
| IBD | rs8134436 | Palindromic SNP |
| IBD | rs113473719 | Not present in any of the three sarcopenia-related trait datasets |
| MS | rs3748817 | Associated with RA |
| MS | rs1359062 | Associated with celiac disease |
| MS | rs9967792 | Associated with hypothyroidism |
| MS | rs842639 | Associated with IBD |
| MS | rs9989735 | Associated with Crohn’s disease |
| MS | rs1131265 | Associated with primary biliary cirrhosis |
| MS | rs71624119 | Associated with RA, etc. |
| MS | rs4976646 | Associated with IBD, etc. |
| MS | rs9277535 | Associated with RA, etc. |
| MS | rs2857700 | Associated with RA, etc. |
| MS | rs3129727 | Associated with RA, etc. |
| MS | rs9263823 | Associated with RA, etc. |
| MS | rs11154801 | Associated with hypothyroidism |
| MS | rs60600003 | Associated with hypothyroidism |
| MS | rs7923837 | Associated with type II diabetes, etc. |
| MS | rs2104286 | Associated with RA |
| MS | rs9736016 | Associated with RA |
| MS | rs1800693 | Associated with primary biliary cirrhosis |
| MS | rs11052877 | Associated with hypothyroidism |
| MS | rs11172342 | Associated with impedance of arm, etc. |
| MS | rs12927355 | Associated with T1D, etc. |
| MS | rs4780355 | Associated with primary biliary cirrhosis, etc. |
| MS | rs4796791 | Associated with IBD |
| MS | rs11554159 | Associated with body mass index, etc. |
| MS | rs10420809 | Associated with arm fat-free mass, etc. |
| MS | rs12296430 | Palindromic SNP |
| MS | rs212405 | Palindromic SNP |
| T1D | rs6679677 | Associated with RA, etc. |
| T1D | rs2111485 | Associated with vitiligo |
| T1D | rs3087243 | Associated with RA, etc. |
| T1D | rs113010081 | Associated with IBD |
| T1D | rs72928038 | Associated with hypothyroidism, etc. |
| T1D | rs2045258 | Associated with whole body fat-free mass, etc. |
| T1D | rs1574285 | Associated with knee pain, etc. |
| T1D | rs61839660 | Associated with Crohn’s disease |
| T1D | rs41295121 | Associated with hypothyroidism |
| T1D | rs1701704 | Associated with vitiligo |
| T1D | rs3184504 | Associated with hypothyroidism |
| T1D | rs1456988 | Associated with graves disease |
| T1D | rs34593439 | Associated with narcolepsy |
| T1D | rs72727394 | Associated with Crohn’s disease, etc. |
| T1D | rs12927355 | Associated with primary biliary cirrhosis |
| T1D | rs8056814 | Associated with type II diabetes, etc. |
| T1D | rs12150079 | Associated with IBD |
| T1D | rs1893217 | Associated with IBD, etc. |
| T1D | rs7239671 | Associated with hypothyroidism |
| T1D | rs2304256 | Associated with SLE, etc. |
| T1D | rs402072 | Associated with primary sclerosing cholangitis |
| T1D | rs516246 | Associated with Crohn’s disease, etc. |
| T1D | rs11203203 | Associated with vitiligo, etc. |
| T1D | rs229533 | Associated with hypothyroidism |
| OAD | rs6679677 | Associated with hypothyroidism |
| OAD | rs4853458 | Associated with hypothyroidism |
| OAD | rs11571297 | Associated with hypothyroidism |
| OAD | rs17786733 | Associated with hypothyroidism |
| OAD | rs1990760 | Associated with hypothyroidism |
| OAD | rs1915930 | Associated with hypothyroidism |
| OAD | rs932036 | Associated with hypothyroidism |
| OAD | rs6828814 | Associated with hypothyroidism |
| OAD | rs9687206 | Associated with serum thyrotropin levels |
| OAD | rs244686 | Associated with hypothyroidism |
| OAD | rs4151670 | Associated with body fat percentage |
| OAD | rs9497965 | Associated with hypothyroidism |
| OAD | rs2516466 | Associated with intestinal malabsorption |
| OAD | rs9273363 | Associated with body mass index |
| OAD | rs3104415 | Associated with height |
| OAD | rs2747442 | Associated with height |
| OAD | rs11755527 | Associated with hypothyroidism |
| OAD | rs2757041 | Associated with hypothyroidism |
| OAD | rs10116520 | Associated with arm fat-free mass right |
| OAD | rs7850258 | Associated with thyroid cancer |
| OAD | rs10905669 | Associated with hypothyroidism |
| OAD | rs71508903 | Associated with hypothyroidism |
| OAD | rs12575636 | Associated with hypothyroidism |
| OAD | rs3184504 | Associated with height |
| OAD | rs10844737 | Associated with hypothyroidism |
| OAD | rs3809822 | Associated with hypothyroidism |
| OAD | rs34536443 | Associated with hypothyroidism |
| OAD | rs78765971 | Not present in any of the three sarcopenia-related trait datasets |
| OAD | rs2017445 | Not present in any of the three sarcopenia-related trait datasets |
| OAD | rs201121732 | Not present in any of the three sarcopenia-related trait datasets |
| OAD | rs111352543 | Not present in any of the three sarcopenia-related trait datasets |
| Abbreviations: SLE, systemic lupus erythematosus; RA, rheumatoid arthritis; MS, multiple sclerosis; IBD, inflammatory bowel disease; T1D, type 1 diabetes; OAD, overall autoimmune disease; SNP, single-nucleotide polymorphism. | | |

| **Supplementary Table S4.** Details of instrument variables used for systemic lupus erythematosus in the discovery sample | | | | | | | | | | | | | | | | |
| --- | --- | --- | --- | --- | --- | --- | --- | --- | --- | --- | --- | --- | --- | --- | --- | --- |
|  |  |  |  |  | SLE | | |  | ALM | |  | Low grip strength | |  | Walking pace | |
| SNP | chr | Position | EA | OA | beta | se | *P*-value |  | beta | se |  | beta | se |  | beta | se |
| rs10048743 | 2 | 213890232 | T | G | -0.2311 | 0.0412 | 2.04E-08 |  | 0.0048 | 0.0027 |  | -0.0259 | 0.0107 |  | -0.0024 | 0.0018 |
| rs1078324 | 5 | 149202268 | A | C | -0.7134 | 0.0782 | 7.11E-20 |  | 0.0025 | 0.0041 |  | -0.0306 | 0.0160 |  | -0.0075 | 0.0027 |
| rs10912578 | 1 | 173251856 | G | A | -0.2469 | 0.0310 | 1.65E-15 |  | 0.0032 | 0.0020 |  | -0.0025 | 0.0079 |  | 0.0036 | 0.0014 |
| rs1143679 | 16 | 31276811 | A | G | 0.5822 | 0.0400 | 5.03E-48 |  | 0.0037 | 0.0032 |  | 0.0224 | 0.0121 |  | 0.0020 | 0.0021 |
| rs12094036 | 1 | 183558174 | C | T | -0.3285 | 0.0579 | 1.37E-08 |  | -0.0053 | 0.0035 |  | -0.0087 | 0.0136 |  | 0.0014 | 0.0023 |
| rs13019891 | 2 | 113829869 | T | G | -0.5621 | 0.0290 | 1.65E-83 |  | 0.0014 | 0.0019 |  | -0.0040 | 0.0074 |  | -0.0018 | 0.0013 |
| rs13136219 | 4 | 102743687 | T | C | -0.1744 | 0.0278 | 3.50E-10 |  | -0.0015 | 0.0020 |  | 0.0040 | 0.0076 |  | -0.0027 | 0.0013 |
| rs13332649 | 16 | 85966683 | G | A | -0.3147 | 0.0376 | 5.43E-17 |  | 0.0015 | 0.0023 |  | 0.0091 | 0.0088 |  | 0.0019 | 0.0015 |
| rs143123127 | 17 | 38007190 | A | G | 0.4700 | 0.0840 | 2.23E-08 |  | 0.0153 | 0.0052 |  | -0.0348 | 0.0224 |  | NA | NA |
| rs1464446 | 3 | 146601295 | T | G | -0.3285 | 0.0401 | 2.79E-16 |  | 0.0020 | 0.0024 |  | 0.0106 | 0.0094 |  | -0.0020 | 0.0016 |
| rs17849501 | 1 | 183542323 | T | C | 0.8109 | 0.0499 | 1.81E-59 |  | -0.0040 | 0.0042 |  | 0.0250 | 0.0168 |  | 0.0011 | 0.0028 |
| rs2459611 | 2 | 191939187 | T | C | 0.2614 | 0.0452 | 7.62E-09 |  | 0.0155 | 0.0032 |  | 0.0111 | 0.0124 |  | -0.0017 | 0.0022 |
| rs2573219 | 2 | 233288667 | C | A | 0.5878 | 0.0429 | 1.13E-42 |  | -0.0081 | 0.0033 |  | -0.0088 | 0.0127 |  | 0.0003 | 0.0022 |
| rs268124 | 2 | 65654364 | T | C | 0.1863 | 0.0324 | 8.60E-09 |  | 0.0037 | 0.0021 |  | 0.0063 | 0.0084 |  | -0.0014 | 0.0014 |
| rs34703115 | 2 | 40282854 | C | T | -0.6162 | 0.1048 | 4.08E-09 |  | -0.0048 | 0.0059 |  | -0.0064 | 0.0229 |  | 0.0050 | 0.0040 |
| rs4388254 | 5 | 133428601 | T | C | 0.3784 | 0.0604 | 3.71E-10 |  | 0.0132 | 0.0050 |  | 0.0031 | 0.0186 |  | 0.0024 | 0.0033 |
| rs4661543 | 1 | 15229101 | G | T | 0.2744 | 0.0424 | 9.40E-11 |  | -0.0031 | 0.0028 |  | -0.0054 | 0.0111 |  | 0.0014 | 0.0019 |
| rs58688157 | 11 | 625085 | G | A | -0.2231 | 0.0336 | 2.97E-11 |  | -0.0044 | 0.0021 |  | -0.0016 | 0.0082 |  | -0.0008 | 0.0014 |
| rs7097397 | 10 | 50025396 | A | G | -0.1863 | 0.0287 | 8.60E-11 |  | 0.0030 | 0.0020 |  | 0.0016 | 0.0076 |  | 0.0004 | 0.0013 |
| rs73050535 | 12 | 5012503 | T | C | -0.7134 | 0.1241 | 9.11E-09 |  | -0.0053 | 0.0062 |  | 0.0145 | 0.0246 |  | -0.0024 | 0.0041 |
| rs73068668 | 19 | 55763262 | A | G | -0.3147 | 0.0575 | 4.40E-08 |  | -0.0145 | 0.0036 |  | 0.0059 | 0.0139 |  | 0.0009 | 0.0024 |
| rs7768653 | 6 | 106574794 | T | C | -0.2070 | 0.0297 | 3.11E-12 |  | -0.0026 | 0.0019 |  | -0.0011 | 0.0075 |  | -0.0022 | 0.0013 |
| rs7823055 | 8 | 55511676 | T | G | -0.3507 | 0.0286 | 1.64E-34 |  | 0.0043 | 0.0019 |  | -0.0110 | 0.0075 |  | 0.0025 | 0.0013 |
| rs9852014 | 3 | 129084581 | G | A | 0.6206 | 0.0493 | 2.26E-36 |  | 0.0083 | 0.0037 |  | 0.0011 | 0.0143 |  | 0.0041 | 0.0025 |
| Abbreviations: SLE, systemic lupus erythematosus; ALM, appendicular lean mass; SNP, single-nucleotide polymorphism; chr, chromosome; EA, effect allele; OA, other allele. | | | | | | | | | | | | | | | | |

| **Supplementary Table S5.** Details of instrument variables used for rheumatoid arthritis in the discovery sample | | | | | | | | | | | | | | | | |
| --- | --- | --- | --- | --- | --- | --- | --- | --- | --- | --- | --- | --- | --- | --- | --- | --- |
|  |  |  |  |  | RA | | |  | ALM | |  | Low grip strength | |  | Walking pace | |
| SNP | chr | Position | EA | OA | beta | se | *P*-value |  | beta | se |  | beta | se |  | beta | se |
| rs10175798 | 2 | 30449594 | A | G | 0.0862 | 0.0139 | 5.40E-09 |  | 0.0013 | 0.0019 |  | 0.008 | 0.0076 |  | -0.0025 | 0.0013 |
| rs11217044 | 11 | 118696022 | C | T | -0.1310 | 0.0182 | 3.60E-15 |  | 0.0027 | 0.0023 |  | 0.0083 | 0.009 |  | 0.0036 | 0.0016 |
| rs112733823 | 6 | 30775277 | T | C | 0.2852 | 0.0188 | 6.60E-39 |  | -0.0148 | 0.0029 |  | 0.0263 | 0.0128 |  | NA | NA |
| rs11574914 | 9 | 34710338 | A | G | 0.1133 | 0.0179 | 2.10E-13 |  | -0.0042 | 0.0020 |  | 0.0078 | 0.0078 |  | -0.0018 | 0.0013 |
| rs12466919 | 2 | 61092858 | T | C | 0.1133 | 0.0135 | 5.70E-13 |  | -0.0030 | 0.0019 |  | -0.0012 | 0.0076 |  | 0.0000 | 0.0013 |
| rs13142500 | 4 | 10727357 | C | T | 0.0943 | 0.0171 | 5.00E-09 |  | 0.0005 | 0.0019 |  | -0.004 | 0.0083 |  | NA | NA |
| rs1611236 | 6 | 29748690 | A | G | -0.1165 | 0.0113 | 2.10E-15 |  | -0.0016 | 0.0020 |  | NA | NA |  | NA | NA |
| rs1858036 | 2 | 65598241 | G | A | -0.1133 | 0.0139 | 1.20E-14 |  | 0.0132 | 0.0020 |  | -0.0113 | 0.0078 |  | -0.0003 | 0.0013 |
| rs187786174 | 1 | 2523811 | A | G | -0.1165 | 0.0169 | 3.30E-14 |  | -0.0004 | 0.0020 |  | -0.0067 | 0.0086 |  | NA | NA |
| rs2105325 | 1 | 173349725 | C | A | 0.1054 | 0.0173 | 3.10E-10 |  | 0.0013 | 0.0021 |  | -0.0017 | 0.0084 |  | 0.0014 | 0.0014 |
| rs212389 | 6 | 159489791 | A | G | 0.0953 | 0.0182 | 3.30E-10 |  | 0.0031 | 0.0019 |  | 0.0101 | 0.0076 |  | -0.0001 | 0.0013 |
| rs2233424 | 6 | 44233921 | T | C | 0.2311 | 0.0276 | 7.60E-19 |  | -0.0006 | 0.0046 |  | 0.0417 | 0.0181 |  | 0.0018 | 0.0031 |
| rs2301888 | 1 | 17672730 | A | G | -0.1278 | 0.0171 | 2.20E-18 |  | 0.0008 | 0.0020 |  | -0.0067 | 0.0077 |  | 0.0018 | 0.0013 |
| rs2317230 | 1 | 157674997 | T | G | 0.0770 | 0.0140 | 2.10E-08 |  | -0.0012 | 0.0019 |  | 0.0062 | 0.0074 |  | -0.0003 | 0.0013 |
| rs28411352 | 1 | 38278579 | T | C | 0.1133 | 0.0135 | 3.60E-12 |  | 0.0041 | 0.0021 |  | -0.0088 | 0.0084 |  | 0.0023 | 0.0014 |
| rs4239702 | 20 | 44749251 | C | T | 0.1165 | 0.0116 | 9.00E-15 |  | -0.0033 | 0.0021 |  | -0.009 | 0.0083 |  | 0.0039 | 0.0014 |
| rs5019428 | 3 | 17046866 | A | G | 0.0862 | 0.0139 | 7.20E-10 |  | 0.0033 | 0.0019 |  | -0.0034 | 0.0081 |  | NA | NA |
| rs6712515 | 2 | 100806514 | C | T | -0.1044 | 0.0140 | 6.70E-15 |  | 0.0064 | 0.0019 |  | -0.0114 | 0.0074 |  | 0.0050 | 0.0013 |
| rs6930468 | 6 | 426268 | G | A | 0.0943 | 0.0113 | 5.50E-11 |  | -0.0031 | 0.0020 |  | 0.0103 | 0.0079 |  | -0.0030 | 0.0014 |
| rs73013527 | 11 | 128496952 | T | C | -0.0943 | 0.0165 | 9.80E-11 |  | -0.0043 | 0.0019 |  | 0.0042 | 0.0074 |  | -0.0025 | 0.0013 |
| rs73081554 | 3 | 58302935 | T | C | 0.1655 | 0.0294 | 4.60E-08 |  | -0.0016 | 0.0037 |  | 0.0009 | 0.0145 |  | -0.0013 | 0.0025 |
| rs76153210 | 6 | 44284508 | T | C | 0.1740 | 0.0251 | 2.20E-09 |  | 0.0169 | 0.0069 |  | -0.0026 | 0.0271 |  | 0.0044 | 0.0047 |
| rs7752903 | 6 | 138227364 | G | T | 0.3285 | 0.0292 | 2.70E-26 |  | -0.0065 | 0.0054 |  | 0.0341 | 0.0212 |  | 0.0040 | 0.0037 |
| rs9258357 | 6 | 29751129 | C | T | 0.1744 | 0.0186 | 5.30E-23 |  | -0.0056 | 0.0026 |  | 0.0025 | 0.0108 |  | NA | NA |
| rs9348832 | 6 | 29456021 | A | G | 0.2546 | 0.0307 | 5.20E-19 |  | -0.0178 | 0.0050 |  | 0.0055 | 0.0195 |  | 0.0006 | 0.0034 |
| rs9603616 | 13 | 40368069 | T | C | -0.1054 | 0.0167 | 4.60E-12 |  | 0.0094 | 0.0020 |  | -0.0082 | 0.0077 |  | 0.0014 | 0.0013 |
| Abbreviations: RA, rheumatoid arthritis; ALM, appendicular lean mass; SNP, single-nucleotide polymorphism; chr, chromosome; EA, effect allele; OA, other allele. | | | | | | | | | | | | | | | | |

| **Supplementary Table S6.** Details of instrument variables used for inflammatory bowel disease in the discovery sample | | | | | | | | | | | | | | | | |
| --- | --- | --- | --- | --- | --- | --- | --- | --- | --- | --- | --- | --- | --- | --- | --- | --- |
|  |  |  |  |  | IBD | | |  | ALM | |  | Low grip strength | |  | Walking pace | |
| SNP | chr | Position | EA | OA | beta | se | *P*-value |  | beta | se |  | beta | se |  | beta | se |
| rs10408351 | 19 | 33754044 | A | G | 0.1378 | 0.0221 | 4.23E-10 |  | -0.0018 | 0.0023 |  | -0.0050 | 0.0090 |  | 0.0011 | 0.0015 |
| rs10737481 | 1 | 20171514 | G | T | 0.1411 | 0.0170 | 1.19E-16 |  | 0.0045 | 0.0019 |  | -0.0160 | 0.0074 |  | -0.0012 | 0.0013 |
| rs10800314 | 1 | 161472789 | A | C | -0.1431 | 0.0179 | 1.17E-15 |  | 0.0015 | 0.0020 |  | -0.0013 | 0.0086 |  | NA | NA |
| rs112401990 | 2 | 61199327 | A | G | 0.1422 | 0.0174 | 2.84E-16 |  | -0.0035 | 0.0020 |  | -0.0021 | 0.0077 |  | 0.0018 | 0.0013 |
| rs11548656 | 16 | 81916912 | G | A | -0.2928 | 0.0507 | 7.72E-09 |  | 0.0020 | 0.0051 |  | -0.0117 | 0.0199 |  | -0.0052 | 0.0034 |
| rs1250573 | 10 | 81042475 | A | G | -0.1136 | 0.0190 | 2.21E-09 |  | 0.0067 | 0.0020 |  | -0.0076 | 0.0079 |  | -0.0035 | 0.0013 |
| rs12764283 | 10 | 35530460 | A | G | 0.1266 | 0.0179 | 1.57E-12 |  | -0.0039 | 0.0020 |  | 0.0037 | 0.0078 |  | 0.0013 | 0.0013 |
| rs140892874 | 12 | 40824798 | C | T | 0.4096 | 0.0512 | 1.28E-15 |  | 0.0048 | 0.0073 |  | 0.0171 | 0.0266 |  | 0.0084 | 0.0049 |
| rs142770866 | 19 | 10525372 | A | G | 0.2300 | 0.0337 | 8.14E-12 |  | 0.0154 | 0.0034 |  | 0.0172 | 0.0134 |  | -0.0029 | 0.0023 |
| rs1551399 | 8 | 126539965 | C | A | 0.1013 | 0.0173 | 5.01E-09 |  | -0.0035 | 0.0019 |  | 0.0078 | 0.0076 |  | -0.0006 | 0.0013 |
| rs1736161 | 21 | 16833222 | A | G | -0.1233 | 0.0174 | 1.34E-12 |  | 0.0080 | 0.0019 |  | 0.0005 | 0.0074 |  | -0.0005 | 0.0013 |
| rs17800987 | 5 | 150323428 | G | A | 0.2017 | 0.0305 | 3.71E-11 |  | -0.0010 | 0.0034 |  | -0.0189 | 0.0134 |  | 0.0001 | 0.0023 |
| rs1886731 | 1 | 2472081 | C | T | -0.0971 | 0.0175 | 3.08E-08 |  | 0.0041 | 0.0019 |  | 0.0060 | 0.0074 |  | -0.0049 | 0.0013 |
| rs2193041 | 12 | 68502110 | G | A | 0.1337 | 0.0172 | 6.91E-15 |  | 0.0014 | 0.0019 |  | -0.0064 | 0.0075 |  | 0.0018 | 0.0013 |
| rs2241878 | 2 | 234183718 | C | T | 0.1480 | 0.0169 | 1.75E-18 |  | -0.0094 | 0.0019 |  | -0.0104 | 0.0074 |  | -0.0023 | 0.0013 |
| rs254560 | 5 | 134443606 | A | G | 0.0995 | 0.0171 | 6.16E-09 |  | -0.0094 | 0.0019 |  | -0.0113 | 0.0075 |  | -0.0028 | 0.0013 |
| rs28383456 | 6 | 32609453 | T | C | -0.1775 | 0.0200 | 5.77E-19 |  | -0.0106 | 0.0068 |  | NA | NA |  | 0.0000 | 0.0046 |
| rs34190331 | 6 | 111840820 | A | G | 0.1769 | 0.0303 | 5.39E-09 |  | -0.0039 | 0.0039 |  | 0.0306 | 0.0149 |  | -0.0027 | 0.0026 |
| rs3850378 | 14 | 88417517 | C | T | 0.1551 | 0.0282 | 3.80E-08 |  | 0.0007 | 0.0032 |  | 0.0156 | 0.0124 |  | -0.0063 | 0.0021 |
| rs45528737 | 4 | 123275555 | T | C | 0.1668 | 0.0300 | 2.66E-08 |  | 0.0041 | 0.0032 |  | -0.0187 | 0.0123 |  | 0.0009 | 0.0021 |
| rs4676408 | 2 | 241574401 | A | G | 0.1181 | 0.0181 | 6.62E-11 |  | 0.0034 | 0.0019 |  | 0.0018 | 0.0074 |  | -0.0010 | 0.0013 |
| rs4730272 | 7 | 107478227 | G | A | -0.1341 | 0.0178 | 4.50E-14 |  | 0.0023 | 0.0019 |  | -0.0083 | 0.0074 |  | 0.0021 | 0.0013 |
| rs4851586 | 2 | 103064264 | C | T | -0.1224 | 0.0193 | 2.32E-10 |  | 0.0082 | 0.0022 |  | -0.0123 | 0.0087 |  | -0.0001 | 0.0015 |
| rs6826501 | 4 | 36076676 | T | C | -0.0928 | 0.0169 | 4.12E-08 |  | 0.0011 | 0.0019 |  | -0.0104 | 0.0074 |  | 0.0005 | 0.0013 |
| rs6873866 | 5 | 96247810 | C | T | -0.1070 | 0.0176 | 1.09E-09 |  | 0.0068 | 0.0019 |  | -0.0038 | 0.0082 |  | NA | NA |
| rs6880778 | 5 | 40399096 | G | A | 0.1878 | 0.0173 | 2.14E-27 |  | -0.0018 | 0.0019 |  | -0.0094 | 0.0075 |  | -0.0012 | 0.0013 |
| rs6911490 | 6 | 106522027 | C | T | -0.1428 | 0.0208 | 6.82E-12 |  | 0.0006 | 0.0023 |  | 0.0015 | 0.0090 |  | -0.0005 | 0.0015 |
| rs72798422 | 16 | 50866917 | C | T | 0.2776 | 0.0431 | 1.19E-10 |  | 0.0024 | 0.0053 |  | 0.0177 | 0.0202 |  | 0.0064 | 0.0035 |
| rs7285952 | 22 | 39733096 | G | T | -0.1760 | 0.0235 | 7.60E-14 |  | 0.0004 | 0.0026 |  | 0.0169 | 0.0100 |  | -0.0022 | 0.0017 |
| rs9370774 | 6 | 14721897 | C | T | -0.1307 | 0.0219 | 2.54E-09 |  | 0.0069 | 0.0024 |  | 0.0073 | 0.0092 |  | -0.0006 | 0.0016 |
| rs9934775 | 16 | 50383077 | T | C | -0.1396 | 0.0232 | 1.71E-09 |  | -0.0055 | 0.0026 |  | -0.0057 | 0.0100 |  | 0.0003 | 0.0017 |
| Abbreviations: IBD, inflammatory bowel disease; ALM, appendicular lean mass; SNP, single-nucleotide polymorphism; chr, chromosome; EA, effect allele; OA, other allele. | | | | | | | | | | | | | | | | |

| **Supplementary Table S7.** Details of instrument variables used for multiple sclerosis in the discovery sample | | | | | | | | | | | | | | | | |
| --- | --- | --- | --- | --- | --- | --- | --- | --- | --- | --- | --- | --- | --- | --- | --- | --- |
|  |  |  |  |  | MS | | |  | ALM | |  | Low grip strength | |  | Walking pace | |
| SNP | chr | Position | EA | OA | beta | se | *P*-value |  | beta | se |  | beta | se |  | beta | se |
| rs1014486 | 3 | 159691112 | C | T | 0.1008 | 0.0166 | 1.16E-09 |  | 0.0011 | 0.0019 |  | -0.0109 | 0.0074 |  | -0.0005 | 0.0013 |
| rs1021156 | 8 | 79575804 | C | T | -0.1151 | 0.0186 | 5.60E-10 |  | 0.0003 | 0.0022 |  | -0.0028 | 0.0085 |  | 0.0027 | 0.0015 |
| rs1077667 | 19 | 6668972 | T | C | -0.1519 | 0.0208 | 3.54E-13 |  | -0.0003 | 0.0023 |  | -0.0093 | 0.0091 |  | 0.0013 | 0.0016 |
| rs115266049 | 6 | 30431011 | A | G | 0.3873 | 0.0649 | 2.37E-09 |  | -0.0012 | 0.0084 |  | 0.0150 | 0.0331 |  | 0.0071 | 0.0057 |
| rs115985474 | 6 | 30055179 | T | C | -0.2515 | 0.0460 | 4.34E-08 |  | -0.0191 | 0.0053 |  | -0.0361 | 0.0206 |  | -0.0046 | 0.0035 |
| rs11865086 | 16 | 30130493 | A | C | -0.0935 | 0.0165 | 1.77E-08 |  | -0.0213 | 0.0024 |  | 0.0064 | 0.0087 |  | 0.0027 | 0.0016 |
| rs12087340 | 1 | 85746993 | T | C | 0.1972 | 0.0287 | 5.13E-12 |  | 0.0036 | 0.0034 |  | 0.0072 | 0.0131 |  | 0.0017 | 0.0023 |
| rs12210359 | 6 | 29966896 | T | C | -0.3819 | 0.0377 | 4.94E-24 |  | 0.0090 | 0.0042 |  | 0.0078 | 0.0164 |  | 0.0047 | 0.0028 |
| rs17066096 | 6 | 137452908 | G | A | 0.1310 | 0.0190 | 5.91E-12 |  | -0.0007 | 0.0022 |  | -0.0020 | 0.0086 |  | 0.0004 | 0.0015 |
| rs1813375 | 3 | 28078571 | T | G | 0.1432 | 0.0166 | 5.75E-18 |  | 0.0019 | 0.0019 |  | 0.0071 | 0.0074 |  | 0.0007 | 0.0013 |
| rs34383631 | 11 | 60793330 | T | C | 0.1053 | 0.0168 | 5.69E-10 |  | -0.0006 | 0.0019 |  | 0.0088 | 0.0075 |  | -0.0021 | 0.0013 |
| rs41286801 | 1 | 92975464 | T | C | 0.1815 | 0.0225 | 7.92E-16 |  | -0.0004 | 0.0026 |  | -0.0003 | 0.0103 |  | -0.0020 | 0.0018 |
| rs4410871 | 8 | 128815029 | C | T | 0.1124 | 0.0187 | 1.98E-09 |  | -0.0015 | 0.0021 |  | 0.0134 | 0.0082 |  | 0.0010 | 0.0014 |
| rs4944958 | 11 | 71168073 | G | A | -0.1071 | 0.0186 | 8.69E-09 |  | -0.0031 | 0.0023 |  | -0.0060 | 0.0088 |  | -0.0010 | 0.0015 |
| rs6677309 | 1 | 117080166 | C | A | -0.2927 | 0.0265 | 1.45E-28 |  | 0.0035 | 0.0029 |  | -0.0053 | 0.0111 |  | -0.0001 | 0.0019 |
| rs67297943 | 6 | 138244816 | C | T | -0.1115 | 0.0205 | 4.83E-08 |  | 0.0036 | 0.0023 |  | -0.0129 | 0.0091 |  | 0.0004 | 0.0016 |
| rs6881706 | 5 | 35879156 | T | G | -0.1106 | 0.0190 | 4.87E-09 |  | 0.0096 | 0.0021 |  | -0.0074 | 0.0083 |  | 0.0008 | 0.0014 |
| rs706015 | 7 | 27014988 | G | T | 0.1293 | 0.0213 | 1.29E-09 |  | 0.0014 | 0.0025 |  | -0.0113 | 0.0096 |  | 0.0020 | 0.0017 |
| rs74796499 | 14 | 88432328 | A | C | -0.2708 | 0.0418 | 8.47E-11 |  | 0.0035 | 0.0044 |  | -0.0161 | 0.0173 |  | 0.0026 | 0.0030 |
| rs7783 | 19 | 16629189 | G | A | 0.0989 | 0.0171 | 9.56E-09 |  | 0.0013 | 0.0020 |  | 0.0148 | 0.0077 |  | 0.0012 | 0.0013 |
| rs8070345 | 17 | 57816757 | C | T | -0.1345 | 0.0167 | 5.43E-16 |  | -0.0080 | 0.0019 |  | 0.0012 | 0.0074 |  | 0.0021 | 0.0013 |
| rs9282641 | 3 | 121796768 | A | G | -0.1939 | 0.0304 | 1.74E-10 |  | 0.0078 | 0.0034 |  | 0.0235 | 0.0129 |  | 0.0022 | 0.0023 |
| Abbreviations: MS, multiple sclerosis; ALM, appendicular lean mass; SNP, single-nucleotide polymorphism; chr, chromosome; EA, effect allele; OA, other allele. | | | | | | | | | | | | | | | | |

| **Supplementary Table S8.** Details of instrument variables used for type 1 diabetes in the discovery sample | | | | | | | | | | | | | | | | |
| --- | --- | --- | --- | --- | --- | --- | --- | --- | --- | --- | --- | --- | --- | --- | --- | --- |
|  |  |  |  |  | T1D | | |  | ALM | |  | Low grip strength | |  | Walking pace | |
| SNP | chr | Position | EA | OA | beta | se | *P*-value |  | beta | se |  | beta | se |  | beta | se |
| rs12416116 | 10 | 90035654 | A | C | -0.1650 | 0.0210 | 3.93E-15 |  | -0.0011 | 0.0021 |  | 0.0188 | 0.0081 |  | 0.0011 | 0.0014 |
| rs151233 | 16 | 28506428 | T | C | 0.1710 | 0.0260 | 4.80E-11 |  | -0.0001 | 0.0028 |  | -0.0019 | 0.0110 |  | 0.0022 | 0.0019 |
| rs2611215 | 4 | 166574267 | G | A | -0.1680 | 0.0250 | 1.82E-11 |  | 0.0020 | 0.0026 |  | 0.0084 | 0.0101 |  | 0.0019 | 0.0017 |
| rs3842727 | 11 | 2184848 | T | G | 0.6870 | 0.0230 | 4.89E-196 |  | -0.0075 | 0.0021 |  | -0.0141 | 0.0081 |  | -0.0005 | 0.0014 |
| rs4820830 | 22 | 30531091 | T | C | -0.1350 | 0.0190 | 1.20E-12 |  | 0.0156 | 0.0020 |  | -0.0068 | 0.0076 |  | 0.0015 | 0.0013 |
| rs4849135 | 2 | 111615079 | G | T | 0.1150 | 0.0210 | 4.35E-08 |  | -0.0036 | 0.0021 |  | 0.0100 | 0.0082 |  | -0.0020 | 0.0014 |
| rs56994090 | 14 | 101306447 | C | T | -0.1290 | 0.0190 | 1.13E-11 |  | 0.0029 | 0.0019 |  | -0.0095 | 0.0075 |  | 0.0008 | 0.0013 |
| rs6043409 | 20 | 1616206 | G | A | 0.1260 | 0.0200 | 2.98E-10 |  | 0.0009 | 0.0020 |  | -0.0014 | 0.0078 |  | -0.0009 | 0.0013 |
| rs62447205 | 7 | 50465830 | G | A | -0.1170 | 0.0210 | 2.53E-08 |  | 0.0047 | 0.0021 |  | -0.0041 | 0.0082 |  | -0.0025 | 0.0014 |
| rs6691977 | 1 | 200814959 | C | T | 0.1260 | 0.0230 | 4.30E-08 |  | 0.0015 | 0.0023 |  | 0.0006 | 0.0091 |  | 0.0010 | 0.0016 |
| rs6827756 | 4 | 123184411 | C | T | -0.1310 | 0.0190 | 5.40E-12 |  | 0.0026 | 0.0020 |  | 0.0203 | 0.0076 |  | 0.0000 | 0.0013 |
| rs9585056 | 13 | 100081766 | T | C | -0.1160 | 0.0210 | 3.32E-08 |  | -0.0030 | 0.0022 |  | -0.0020 | 0.0086 |  | 0.0001 | 0.0015 |
| Abbreviations: T1D, type 1 diabetes; ALM, appendicular lean mass; SNP, single-nucleotide polymorphism; chr, chromosome; EA, effect allele; OA, other allele. | | | | | | | | | | | | | | | | |

| **Supplementary Table S9.** Details of instrument variables used for overall autoimmune disease | | | | | | | | | | | | | | | | |
| --- | --- | --- | --- | --- | --- | --- | --- | --- | --- | --- | --- | --- | --- | --- | --- | --- |
|  |  |  |  |  | Overall autoimmune disease | | |  | ALM | |  | Low grip strength | |  | Walking pace | |
| SNP | chr | Position | EA | OA | beta | se | P-value |  | beta | se |  | beta | se |  | beta | se |
| rs10081055 | 6 | 33817796 | G | T | -0.0574 | 0.0100 | 9.48E-09 |  | -0.0122 | 0.0020 |  | 0.0008 | 0.0079 |  | -0.0015 | 0.0014 |
| rs10088596 | 8 | 141640294 | C | T | -0.0563 | 0.0094 | 1.91E-09 |  | -0.0094 | 0.0021 |  | 0.0046 | 0.0083 |  | 0.0011 | 0.0014 |
| rs12135754 | 1 | 65342505 | C | A | -0.0840 | 0.0144 | 5.20E-09 |  | -0.0019 | 0.0033 |  | -0.0102 | 0.0130 |  | -0.0018 | 0.0022 |
| rs13105678 | 4 | 40260379 | A | C | 0.0514 | 0.0091 | 1.65E-08 |  | 0.0020 | 0.0020 |  | -0.0014 | 0.0076 |  | -0.0028 | 0.0013 |
| rs13220783 | 6 | 21885023 | T | G | 0.0537 | 0.0091 | 3.86E-09 |  | -0.0013 | 0.0019 |  | -0.0095 | 0.0075 |  | 0.0016 | 0.0013 |
| rs139805598 | 7 | 5325413 | T | C | -0.1469 | 0.0256 | 1.00E-08 |  | 0.0006 | 0.0097 |  | -0.0078 | 0.0412 |  | NA | NA |
| rs1683253 | 1 | 114638577 | C | T | 0.0537 | 0.0089 | 1.77E-09 |  | -0.0013 | 0.0019 |  | -0.0014 | 0.0073 |  | -0.0002 | 0.0013 |
| rs2281388 | 6 | 33060118 | A | G | -0.2272 | 0.0300 | 3.34E-14 |  | 0.0100 | 0.0065 |  | -0.0310 | 0.0255 |  | 0.0027 | 0.0044 |
| rs2293158 | 17 | 40447558 | C | T | -0.0598 | 0.0104 | 9.75E-09 |  | -0.0026 | 0.0021 |  | 0.0093 | 0.0080 |  | -0.0020 | 0.0014 |
| rs2847258 | 18 | 12775963 | T | C | -0.0498 | 0.0089 | 2.02E-08 |  | -0.0038 | 0.0019 |  | 0.0048 | 0.0074 |  | -0.0002 | 0.0013 |
| rs310772 | 3 | 12239791 | A | G | -0.0603 | 0.0105 | 1.05E-08 |  | -0.0017 | 0.0022 |  | -0.0095 | 0.0085 |  | 0.0029 | 0.0015 |
| rs35508742 | 10 | 63984816 | CT | C | -0.0520 | 0.0092 | 1.69E-08 |  | 0.0030 | 0.0019 |  | -0.0070 | 0.0082 |  | NA | NA |
| rs35789143 | 7 | 128727730 | A | G | 0.0747 | 0.0119 | 3.94E-10 |  | -0.0005 | 0.0028 |  | 0.0383 | 0.0117 |  | NA | NA |
| rs3842753 | 11 | 2181060 | G | T | 0.0771 | 0.0110 | 2.45E-12 |  | -0.0081 | 0.0021 |  | -0.0182 | 0.0082 |  | -0.0009 | 0.0014 |
| rs4073285 | 1 | 2539796 | T | C | -0.0577 | 0.0092 | 3.90E-10 |  | -0.0015 | 0.0020 |  | 0.0007 | 0.0078 |  | -0.0010 | 0.0013 |
| rs5845323 | 22 | 37583732 | GC | G | 0.0666 | 0.0090 | 1.67E-13 |  | 0.0011 | 0.0019 |  | -0.0046 | 0.0082 |  | NA | NA |
| rs7002588 | 8 | 129624152 | A | C | 0.1040 | 0.0190 | 4.46E-08 |  | -0.0066 | 0.0055 |  | 0.0337 | 0.0225 |  | 0.0017 | 0.0037 |
| rs7205474 | 16 | 11043413 | T | C | -0.0641 | 0.0116 | 3.51E-08 |  | -0.0047 | 0.0026 |  | -0.0051 | 0.0102 |  | -0.0012 | 0.0018 |
| rs73188832 | 13 | 46834477 | G | A | -0.1578 | 0.0275 | 1.02E-08 |  | 0.0051 | 0.0082 |  | -0.0107 | 0.0319 |  | 0.0000 | 0.0055 |
| rs76169968 | 11 | 117082966 | A | G | -0.0950 | 0.0149 | 1.99E-10 |  | -0.0167 | 0.0034 |  | 0.0038 | 0.0133 |  | -0.0001 | 0.0023 |
| rs7823488 | 8 | 8336053 | T | C | 0.1192 | 0.0214 | 2.62E-08 |  | 0.0129 | 0.0057 |  | -0.0087 | 0.0220 |  | -0.0042 | 0.0038 |
| rs9863204 | 3 | 46050343 | G | A | 0.0522 | 0.0093 | 2.31E-08 |  | 0.0052 | 0.0020 |  | -0.0042 | 0.0079 |  | -0.0013 | 0.0014 |
| Abbreviations: ALM, appendicular lean mass; SNP, single-nucleotide polymorphism; chr, chromosome; EA, effect allele; OA, other allele. | | | | | | | | | | | | | | | | |

| **Supplementary Table S10.** Results of tests for pleiotropy and heterogeneity | | | | | | | |
| --- | --- | --- | --- | --- | --- | --- | --- |
|  |  | Cochran's Q test | | MR-Egger  *Pintercept* | MR-PRESSO | | |
| Outcome | Exposure | Q | *P*-value | *P*_glo | Outliers | *P*_dis |
| ALM | SLE | 97.91 | <0.001 | 0.547 | <0.001 | 4 | 0.230 |
|  | RA | 123.61 | <0.001 | 0.105 | <0.001 | 5 | 0.015 |
|  | IBD | 149.80 | <0.001 | 0.004 | <0.001 | 5 | 0.603 |
|  | MS | 150.07 | <0.001 | 0.257 | <0.001 | 4 | 0.228 |
|  | T1D | 62.94 | <0.001 | 0.542 | 0.001 | 1 | 0.185 |
|  | OAD | 114.08 | <0.001 | 0.263 | <0.001 | 4 | 0.039 |
| Low grip strength | SLE | 23.08 | 0.456 | 0.620 | 0.376 | NA | NA |
|  | RA | 21.51 | 0.608 | 0.232 | 0.725 | NA | NA |
|  | IBD | 36.89 | 0.149 | 0.942 | 0.087 | NA | NA |
|  | MS | 23.09 | 0.339 | 0.541 | 0.278 | NA | NA |
|  | T1D | 16.75 | 0.115 | 0.644 | 0.264 | NA | NA |
|  | OAD | 26.96 | 0.172 | 0.177 | 0.147 | NA | NA |
| Walking pace | SLE | 38.55 | 0.016 | 0.397 | 0.015 | 0 | NA |
|  | RA | 50.35 | <0.001 | 0.303 | <0.001 | 2 | 0.791 |
|  | IBD | 62.15 | <0.001 | 0.856 | <0.001 | 1 | 0.337 |
|  | MS | 23.97 | 0.295 | 0.722 | 0.346 | NA | NA |
|  | T1D | 10.50 | 0.486 | 0.672 | 0.587 | NA | NA |
|  | OAD | 18.81 | 0.339 | 0.826 | 0.119 | NA | NA |
| Abbreviations: SLE, systemic lupus erythematosus; RA, rheumatoid arthritis; MS, multiple sclerosis; IBD, inflammatory bowel disease; T1D, type 1 diabetes; OAD, overall autoimmune disease; ALM, appendicular lean mass; MR-PRESSO, MR-Pleiotropy RESidual Sum and Outlier; *P*_glo, *P*-value for global test; *P*_dis, *P*-value for distortion test. | | | | | | | |

| **Supplementary Table S11.** MR analysis of associations between five autoimmune diseases and appendicular lean mass in replication samples | | | | |
| --- | --- | --- | --- | --- |
| Exposure | nSNP | MR method | OR (95% CI) | *P*-value |
| SLE | 2 | IVW | 1.012 (0.979-1.045) | 0.4873 |
|  | 2 | MR-RAPS | 1.001 (0.980-1.022) | 0.9230 |
| RA | 3 | IVW | 0.966 (0.951-0.982) | <0.0001 |
|  | 3 | Weighted median | 0.969 (0.963-0.974) | <0.0001 |
|  | 3 | MR-RAPS | 0.967 (0.953-0.980) | <0.0001 |
| IBD | 5 | IVW | 1.020 (0.998-1.044) | 0.0808 |
|  | 5 | Weighted median | 1.011 (0.999-1.023) | 0.0690 |
|  | 5 | MR-RAPS | 1.015 (0.998-1.032) | 0.0807 |
| MS | 3 | IVW | 1.024 (1.002-1.046) | 0.0293 |
|  | 3 | Weighted median | 1.018 (1.007-1.029) | 0.0009 |
|  | 3 | MR-RAPS | 1.006 (0.987-1.025) | 0.5239 |
| T1D | 3 | IVW | 0.975 (0.940-1.012) | 0.1795 |
|  | 3 | Weighted median | 0.993 (0.976-1.011) | 0.4717 |
|  | 3 | MR-RAPS | 0.985 (0.960-1.012) | 0.2718 |
| Abbreviations: SLE, systemic lupus erythematosus; RA, rheumatoid arthritis; MS, multiple sclerosis; IBD, inflammatory bowel disease; T1D, type 1 diabetes; nSNP, number of single-nucleotide polymorphisms; MR, Mendelian randomization; IVW, inverse-variance-weighted; MR-RAPS, MR-robust adjusted profile score; OR, odds ratio; CI, confidence interval. | | | | |

| **Supplementary Table S12.** MR analysis of associations between five autoimmune diseases and low grip strength in replication samples | | | | |
| --- | --- | --- | --- | --- |
| Exposure | nSNP | MR method | OR (95% CI) | *P*-value |
| SLE | 2 | IVW | 0.999 (0.945-1.056) | 0.9666 |
|  | 2 | MR-RAPS | 1.011 (0.970-1.054) | 0.5952 |
| RA | 3 | IVW | 1.067 (1.043-1.090) | <0.0001 |
|  | 3 | Weighted median | 1.068 (1.043-1.093) | <0.0001 |
|  | 3 | MR-RAPS | 1.067 (1.042-1.091) | <0.0001 |
| IBD | 5 | IVW | 0.995 (0.927-1.067) | 0.8833 |
|  | 5 | Weighted median | 1.031 (0.984-1.081) | 0.1935 |
|  | 5 | MR-RAPS | 1.015 (0.952-1.082) | 0.6549 |
| MS | 2 | IVW | 1.002 (0.938-1.070) | 0.9479 |
|  | 2 | MR-RAPS | 1.032 (0.963-1.105) | 0.3742 |
| T1D | 2 | IVW | 1.021 (0.976-1.068) | 0.3647 |
|  | 2 | MR-RAPS | 1.021 (0.975-1.070) | 0.3788 |
| Abbreviations: SLE, systemic lupus erythematosus; RA, rheumatoid arthritis; MS, multiple sclerosis; IBD, inflammatory bowel disease; T1D, type 1 diabetes; nSNP, number of single-nucleotide polymorphisms; MR, Mendelian randomization; IVW, inverse-variance-weighted; MR-RAPS, MR-robust adjusted profile score; OR, odds ratio; CI, confidence interval. | | | | |

| **Supplementary Table S13.** MR analysis of associations between five autoimmune diseases and walking pace in replication samples | | | | |
| --- | --- | --- | --- | --- |
| Exposure | nSNP | MR method | OR (95% CI) | *P*-value |
| SLE | 1 | Wald ratio | 1.001 (0.996-1.006) | 0.6860 |
| RA | 1 | Wald ratio | 0.998 (0.972-1.025) | 0.8824 |
| IBD | 5 | IVW | 1.000 (0.994-1.007) | 0.9266 |
|  | 5 | Weighted median | 0.997 (0.990-1.005) | 0.5068 |
|  | 5 | MR-RAPS | 0.999 (0.993-1.006) | 0.8703 |
| MS | 1 | Wald ratio | 0.991 (0.978-1.003) | 0.1412 |
| T1D | 1 | Wald ratio | 0.992 (0.977-1.006) | 0.2603 |
| Abbreviations: SLE, systemic lupus erythematosus; RA, rheumatoid arthritis; MS, multiple sclerosis; IBD, inflammatory bowel disease; T1D, type 1 diabetes; nSNP, number of single-nucleotide polymorphisms; MR, Mendelian randomization; IVW, inverse-variance-weighted; MR-RAPS, MR-robust adjusted profile score; OR, odds ratio; CI, confidence interval. | | | | |

| **Supplementary Table S14.** Details of instrument variables used for appendicular lean mass in reverse MR analyses | | | | | | | | |
| --- | --- | --- | --- | --- | --- | --- | --- | --- |
| SNP | chr | Position | EA | OA | eaf | beta | se | *P*-value |
| rs10019221 | 4 | 21785364 | T | G | 0.5974 | -0.0124 | 0.0019 | 1.22E-10 |
| rs10075249 | 5 | 52846505 | T | C | 0.4952 | 0.0143 | 0.0019 | 4.56E-14 |
| rs10107388 | 8 | 145004944 | C | T | 0.3691 | -0.0159 | 0.002 | 6.95E-16 |
| rs10112506 | 8 | 13164746 | G | A | 0.3898 | -0.012 | 0.0019 | 5.76E-10 |
| rs10128333 | 10 | 64570038 | T | C | 0.1676 | -0.0146 | 0.0025 | 9.51E-09 |
| rs10171272 | 2 | 25946636 | A | C | 0.3035 | 0.0136 | 0.002 | 2.87E-11 |
| rs10205141 | 2 | 11313340 | G | A | 0.0476 | 0.0241 | 0.0044 | 4.71E-08 |
| rs10242866 | 7 | 17920613 | T | C | 0.3983 | 0.0157 | 0.0019 | 3.66E-16 |
| rs1035583 | 2 | 207326937 | A | G | 0.6177 | 0.0148 | 0.0019 | 1.99E-14 |
| rs10453441 | 22 | 46363739 | G | A | 0.402 | -0.0139 | 0.002 | 9.10E-13 |
| rs1056747 | 9 | 35690102 | G | A | 0.4117 | -0.0155 | 0.0019 | 8.05E-16 |
| rs10637890 | 14 | 54779522 | TTC | T | 0.621 | -0.0123 | 0.002 | 3.96E-10 |
| rs10749157 | 10 | 115780129 | C | T | 0.3584 | 0.0113 | 0.002 | 1.24E-08 |
| rs10776560 | 10 | 50542358 | T | C | 0.4995 | -0.0157 | 0.0019 | 7.88E-17 |
| rs10796828 | 11 | 69490346 | G | T | 0.6348 | 0.0154 | 0.002 | 5.77E-15 |
| rs10815274 | 9 | 5728968 | C | A | 0.4562 | 0.0124 | 0.0019 | 6.46E-11 |
| rs10829226 | 10 | 27573952 | A | G | 0.6359 | -0.0112 | 0.002 | 1.33E-08 |
| rs10864899 | 2 | 112929481 | G | A | 0.5643 | -0.0112 | 0.0019 | 3.85E-09 |
| rs10975935 | 9 | 6954579 | G | A | 0.2464 | -0.0121 | 0.0022 | 4.15E-08 |
| rs11042717 | 11 | 10303939 | C | T | 0.4896 | -0.029 | 0.0019 | 4.04E-53 |
| rs11060942 | 12 | 123434524 | A | G | 0.0344 | -0.0354 | 0.0052 | 7.49E-12 |
| rs11121615 | 1 | 10825577 | T | C | 0.6894 | -0.0202 | 0.002 | 3.32E-23 |
| rs111622870 | 4 | 2613109 | C | T | 0.0482 | -0.0282 | 0.0044 | 1.86E-10 |
| rs11191208 | 10 | 103838497 | A | G | 0.2057 | 0.0147 | 0.0024 | 3.69E-10 |
| rs11198591 | 10 | 120515892 | A | G | 0.3684 | 0.0148 | 0.002 | 4.91E-14 |
| rs11221657 | 11 | 129181358 | G | T | 0.1352 | 0.0179 | 0.0028 | 1.21E-10 |
| rs112537273 | 8 | 38248306 | C | T | 0.2299 | -0.0212 | 0.0022 | 3.34E-21 |
| rs11260035 | 19 | 7898957 | A | G | 0.2761 | 0.015 | 0.0021 | 1.86E-12 |
| rs11260623 | 1 | 1781456 | T | G | 0.5085 | 0.0117 | 0.0019 | 4.86E-10 |
| rs113671109 | 3 | 12620885 | C | T | 0.22 | -0.015 | 0.0023 | 4.23E-11 |
| rs113827862 | 14 | 89849527 | C | T | 0.0608 | -0.0235 | 0.004 | 4.67E-09 |
| rs11421589 | 10 | 115193949 | CT | C | 0.5556 | 0.0119 | 0.0019 | 5.99E-10 |
| rs11580040 | 1 | 155198222 | G | A | 0.08 | 0.0325 | 0.0035 | 6.76E-21 |
| rs115912456 | 5 | 82815158 | G | A | 0.0412 | 0.0577 | 0.0047 | 3.69E-34 |
| rs116052377 | 4 | 124787756 | A | G | 0.0809 | 0.0225 | 0.0035 | 7.89E-11 |
| rs11605297 | 11 | 58296806 | A | G | 0.2328 | 0.0146 | 0.0022 | 8.03E-11 |
| rs116092985 | 16 | 2160973 | G | A | 0.0958 | -0.0401 | 0.0033 | 1.17E-34 |
| rs116339650 | 4 | 26200972 | G | A | 0.127 | -0.0175 | 0.0029 | 1.05E-09 |
| rs11672848 | 19 | 37570704 | T | C | 0.5246 | -0.0171 | 0.0019 | 7.73E-19 |
| rs1168768 | 12 | 66509650 | T | C | 0.975 | 0.0332 | 0.006 | 3.61E-08 |
| rs116919274 | 19 | 17359808 | A | G | 0.046 | 0.0271 | 0.0046 | 3.52E-09 |
| rs117068593 | 14 | 93118229 | T | C | 0.1895 | 0.0403 | 0.0024 | 8.83E-62 |
| rs11720869 | 3 | 185619716 | A | G | 0.6686 | 0.0141 | 0.002 | 2.54E-12 |
| rs11721522 | 4 | 156976051 | G | A | 0.4125 | 0.0106 | 0.0019 | 4.03E-08 |
| rs117818446 | 8 | 67223589 | A | G | 0.0202 | 0.0423 | 0.0068 | 5.29E-10 |
| rs11867855 | 17 | 18262584 | T | G | 0.2372 | -0.0132 | 0.0022 | 2.93E-09 |
| rs1202186 | 7 | 87213258 | T | C | 0.6548 | -0.012 | 0.002 | 1.65E-09 |
| rs12340775 | 9 | 13226945 | A | G | 0.0552 | -0.0287 | 0.0043 | 1.73E-11 |
| rs12483401 | 21 | 35443829 | C | T | 0.0216 | -0.0387 | 0.0067 | 9.22E-09 |
| rs12512942 | 4 | 177766307 | A | G | 0.6376 | -0.0162 | 0.002 | 1.58E-16 |
| rs12517711 | 5 | 60754661 | C | T | 0.3917 | -0.0147 | 0.0019 | 2.79E-14 |
| rs12519407 | 5 | 137651012 | C | A | 0.2567 | 0.0181 | 0.0022 | 3.38E-17 |
| rs12536902 | 7 | 33213009 | A | C | 0.0143 | 0.0479 | 0.0081 | 3.66E-09 |
| rs12655296 | 5 | 15890643 | T | C | 0.6251 | -0.011 | 0.002 | 1.62E-08 |
| rs12907139 | 15 | 73521566 | A | G | 0.5245 | -0.0149 | 0.0019 | 4.89E-15 |
| rs12926103 | 16 | 86371775 | A | G | 0.0661 | 0.0272 | 0.0038 | 9.60E-13 |
| rs12997625 | 2 | 202970250 | T | C | 0.5266 | -0.017 | 0.0019 | 1.50E-19 |
| rs13037813 | 20 | 47750588 | C | T | 0.2391 | 0.0292 | 0.0022 | 1.71E-39 |
| rs13109280 | 4 | 54380513 | G | A | 0.6618 | 0.0131 | 0.002 | 9.15E-11 |
| rs13123591 | 4 | 120105990 | G | T | 0.3375 | 0.0185 | 0.002 | 2.35E-20 |
| rs13170063 | 5 | 157895013 | A | G | 0.5921 | -0.0152 | 0.0019 | 4.11E-15 |
| rs1340022 | 8 | 131334465 | C | T | 0.4868 | 0.0118 | 0.0019 | 4.47E-10 |
| rs1341215 | 9 | 111662350 | A | G | 0.1374 | 0.0229 | 0.0027 | 6.32E-17 |
| rs139921635 | 4 | 73181637 | T | G | 0.0236 | 0.0385 | 0.0062 | 6.16E-10 |
| rs1405227 | 1 | 98873390 | A | G | 0.3167 | 0.0129 | 0.002 | 1.57E-10 |
| rs140657345 | 15 | 41615909 | TCCTC | T | 0.2519 | -0.02 | 0.0022 | 5.53E-20 |
| rs143076454 | 16 | 921179 | A | G | 0.0186 | -0.0499 | 0.007 | 1.06E-12 |
| rs143554698 | 9 | 95538573 | T | C | 0.1409 | -0.0257 | 0.0027 | 3.39E-21 |
| rs144627572 | 2 | 20583907 | A | G | 0.0329 | 0.0439 | 0.0053 | 1.30E-16 |
| rs148617731 | 4 | 87616668 | CAG | C | 0.0519 | 0.041 | 0.0043 | 5.92E-22 |
| rs150188352 | 1 | 56632354 | CAAT | C | 0.1935 | 0.0305 | 0.0024 | 8.43E-38 |
| rs1514134 | 1 | 56116513 | C | T | 0.3849 | -0.0114 | 0.0019 | 3.57E-09 |
| rs1584011 | 11 | 27080527 | G | T | 0.3559 | 0.0159 | 0.002 | 9.78E-16 |
| rs165849 | 22 | 19958669 | A | G | 0.6975 | 0.0157 | 0.0021 | 4.57E-14 |
| rs16989695 | 19 | 4505445 | A | G | 0.5165 | -0.0139 | 0.0019 | 1.93E-13 |
| rs17681189 | 2 | 65976175 | A | C | 0.4231 | -0.0131 | 0.0019 | 5.82E-12 |
| rs17773965 | 2 | 217631338 | T | C | 0.1412 | -0.0163 | 0.0027 | 1.51E-09 |
| rs17818592 | 16 | 86088594 | C | T | 0.4367 | -0.0129 | 0.0019 | 1.23E-11 |
| rs1899040 | 2 | 223901896 | T | C | 0.7962 | 0.0152 | 0.0023 | 9.04E-11 |
| rs190823861 | 4 | 73505911 | A | G | 0.0466 | -0.0345 | 0.0045 | 2.09E-14 |
| rs200439 | 1 | 6716083 | C | A | 0.2207 | -0.0128 | 0.0023 | 1.51E-08 |
| rs201570119 | 2 | 112256320 | C | T | 0.2098 | 0.0194 | 0.0023 | 5.48E-17 |
| rs2101017 | 12 | 122306857 | T | C | 0.8695 | -0.0223 | 0.0028 | 1.44E-15 |
| rs2138374 | 2 | 190014317 | C | T | 0.696 | -0.0149 | 0.002 | 2.79E-13 |
| rs2140619 | 7 | 114007270 | G | A | 0.4128 | 0.0113 | 0.0019 | 5.18E-09 |
| rs2188805 | 7 | 93078400 | C | A | 0.3359 | 0.0114 | 0.002 | 2.00E-08 |
| rs2212926 | 21 | 38066883 | A | C | 0.2106 | -0.022 | 0.0023 | 7.75E-21 |
| rs2237485 | 7 | 50749870 | A | G | 0.2234 | 0.0191 | 0.0023 | 3.73E-17 |
| rs2268718 | 6 | 52415023 | T | C | 0.2704 | 0.0141 | 0.0021 | 3.24E-11 |
| rs2283200 | 11 | 2729340 | T | C | 0.0559 | -0.0281 | 0.0042 | 1.48E-11 |
| rs2287821 | 19 | 33935102 | T | C | 0.5091 | -0.0153 | 0.0019 | 6.95E-16 |
| rs2303423 | 4 | 38120029 | C | T | 0.1095 | 0.0168 | 0.003 | 2.64E-08 |
| rs2324154 | 4 | 24027226 | A | C | 0.5096 | 0.015 | 0.0019 | 1.92E-15 |
| rs234640 | 1 | 184867830 | T | C | 0.5142 | -0.0131 | 0.0019 | 3.87E-12 |
| rs249677 | 5 | 141539339 | A | C | 0.6333 | -0.0109 | 0.002 | 2.40E-08 |
| rs2521349 | 17 | 67503501 | A | G | 0.3847 | 0.0155 | 0.0019 | 2.01E-15 |
| rs2545339 | 5 | 149911219 | G | A | 0.6288 | 0.0115 | 0.002 | 3.48E-09 |
| rs2569888 | 6 | 1625803 | A | G | 0.2449 | 0.0133 | 0.0022 | 2.29E-09 |
| rs2578565 | 5 | 5460569 | T | C | 0.6575 | -0.0141 | 0.002 | 1.37E-12 |
| rs258794 | 5 | 142540040 | T | G | 0.2764 | 0.0147 | 0.0021 | 6.23E-12 |
| rs2607234 | 19 | 35563834 | G | A | 0.9476 | -0.0302 | 0.0043 | 2.00E-12 |
| rs261223 | 5 | 95901046 | C | A | 0.3702 | 0.0175 | 0.0019 | 2.30E-19 |
| rs2717008 | 2 | 58149158 | C | T | 0.3835 | -0.0127 | 0.0019 | 4.99E-11 |
| rs2748501 | 6 | 146312258 | A | G | 0.4395 | -0.0195 | 0.0019 | 1.31E-24 |
| rs2754255 | 6 | 88393572 | G | A | 0.2245 | -0.0153 | 0.0023 | 1.05E-11 |
| rs2788213 | 6 | 703249 | A | G | 0.7104 | 0.0123 | 0.0021 | 3.80E-09 |
| rs28529426 | 7 | 4678264 | T | C | 0.1711 | -0.0168 | 0.0026 | 5.82E-11 |
| rs28736838 | 1 | 120148713 | T | C | 0.3017 | -0.0117 | 0.002 | 1.07E-08 |
| rs2923411 | 8 | 42455206 | C | T | 0.5946 | 0.0127 | 0.0019 | 4.77E-11 |
| rs2971857 | 2 | 234369487 | A | G | 0.5752 | -0.0119 | 0.0019 | 3.70E-10 |
| rs2978362 | 18 | 32959397 | T | C | 0.5326 | 0.0106 | 0.0019 | 2.85E-08 |
| rs3033487 | 1 | 227731073 | TCC | T | 0.8119 | 0.0153 | 0.0024 | 1.93E-10 |
| rs3063063 | 2 | 183231361 | TGAA | T | 0.6862 | -0.0182 | 0.002 | 2.57E-19 |
| rs3103223 | 4 | 42402721 | C | T | 0.7397 | 0.0126 | 0.0022 | 6.02E-09 |
| rs31196 | 5 | 158300798 | A | C | 0.5724 | -0.0107 | 0.0019 | 2.07E-08 |
| rs331917 | 5 | 98158524 | G | A | 0.5803 | -0.0127 | 0.0019 | 3.54E-11 |
| rs332116 | 10 | 28926099 | T | C | 0.2804 | -0.0206 | 0.0021 | 2.89E-22 |
| rs336630 | 3 | 18607538 | T | C | 0.43 | -0.0106 | 0.0019 | 2.90E-08 |
| rs33986149 | 5 | 88270485 | CA | C | 0.3883 | -0.0154 | 0.0019 | 2.23E-15 |
| rs34338597 | 12 | 106301580 | G | A | 0.3832 | -0.0112 | 0.0019 | 7.88E-09 |
| rs34345560 | 11 | 69081998 | A | G | 0.1952 | 0.0219 | 0.0024 | 7.10E-20 |
| rs34522021 | 9 | 23350420 | T | C | 0.4547 | 0.0126 | 0.0019 | 3.38E-11 |
| rs34654458 | 1 | 150546790 | ATTT | A | 0.5784 | -0.0191 | 0.0019 | 5.72E-24 |
| rs35086476 | 8 | 97607566 | GA | G | 0.4971 | 0.0109 | 0.0019 | 8.43E-09 |
| rs35166681 | 6 | 85369727 | TA | T | 0.159 | 0.0214 | 0.0026 | 1.55E-16 |
| rs35223841 | 2 | 144053000 | GAA | G | 0.3891 | 0.0106 | 0.0019 | 4.25E-08 |
| rs35230100 | 14 | 70348141 | CATAT | C | 0.4328 | -0.0262 | 0.002 | 4.42E-40 |
| rs35268848 | 16 | 67927240 | A | C | 0.0119 | 0.0737 | 0.0101 | 2.83E-13 |
| rs35288270 | 10 | 4961278 | C | T | 0.1344 | -0.0328 | 0.0028 | 3.43E-32 |
| rs35631698 | 21 | 16549469 | GC | G | 0.3746 | 0.0145 | 0.002 | 2.59E-13 |
| rs36052389 | 4 | 39357183 | AT | A | 0.4554 | 0.0132 | 0.0019 | 5.27E-12 |
| rs3768495 | 1 | 109935325 | T | C | 0.7173 | -0.0178 | 0.0021 | 1.07E-17 |
| rs3769598 | 2 | 32679732 | G | A | 0.1438 | 0.0171 | 0.0027 | 1.32E-10 |
| rs3778858 | 7 | 129963356 | T | G | 0.3698 | 0.0108 | 0.002 | 4.26E-08 |
| rs3782811 | 12 | 3339927 | A | C | 0.2507 | -0.0165 | 0.0022 | 3.96E-14 |
| rs3792819 | 5 | 172576296 | G | A | 0.0854 | 0.021 | 0.0034 | 4.42E-10 |
| rs395980 | 4 | 177430072 | G | T | 0.2635 | -0.0184 | 0.0021 | 1.02E-17 |
| rs4077103 | 8 | 49557732 | A | C | 0.8426 | -0.0143 | 0.0026 | 4.18E-08 |
| rs4121583 | 18 | 125075 | T | C | 0.6192 | 0.0118 | 0.002 | 4.62E-09 |
| rs4383083 | 15 | 63080442 | A | G | 0.6466 | 0.0111 | 0.002 | 2.91E-08 |
| rs447352 | 5 | 678750 | T | C | 0.1408 | -0.0181 | 0.0029 | 6.62E-10 |
| rs45474992 | 19 | 47724564 | T | C | 0.0362 | -0.0617 | 0.0051 | 2.17E-33 |
| rs4602848 | 8 | 92186933 | G | A | 0.6812 | 0.016 | 0.002 | 3.14E-15 |
| rs4644481 | 1 | 155130900 | T | C | 0.4328 | -0.0112 | 0.0019 | 3.54E-09 |
| rs4683435 | 3 | 142624732 | G | A | 0.7723 | 0.0144 | 0.0022 | 1.60E-10 |
| rs4818280 | 21 | 18114472 | T | C | 0.6269 | -0.0124 | 0.002 | 2.84E-10 |
| rs4938359 | 11 | 117093560 | G | A | 0.2024 | -0.0156 | 0.0024 | 3.24E-11 |
| rs4940874 | 18 | 57105638 | G | A | 0.8119 | 0.0148 | 0.0024 | 1.24E-09 |
| rs532499 | 13 | 30165465 | C | T | 0.7413 | -0.0127 | 0.0022 | 4.90E-09 |
| rs544136 | 3 | 101041229 | G | T | 0.7482 | 0.0121 | 0.0022 | 2.50E-08 |
| rs545104 | 11 | 118591352 | C | T | 0.6164 | 0.0127 | 0.002 | 8.08E-11 |
| rs55717234 | 1 | 150999863 | G | A | 0.5732 | 0.0122 | 0.0019 | 1.34E-10 |
| rs568267 | 18 | 8799828 | T | C | 0.7431 | 0.0122 | 0.0022 | 2.23E-08 |
| rs57513571 | 17 | 2309130 | T | C | 0.2004 | -0.0191 | 0.0024 | 7.02E-16 |
| rs5753518 | 22 | 31631314 | A | G | 0.0899 | 0.0242 | 0.0033 | 5.04E-13 |
| rs57696574 | 20 | 54884826 | C | A | 0.3981 | 0.0173 | 0.002 | 4.50E-18 |
| rs60142646 | 2 | 46532856 | TC | T | 0.9479 | -0.0237 | 0.0042 | 2.49E-08 |
| rs60408354 | 7 | 70158495 | A | G | 0.0732 | 0.0259 | 0.0036 | 1.15E-12 |
| rs6082354 | 20 | 21217976 | C | A | 0.6675 | -0.024 | 0.002 | 1.19E-32 |
| rs61827272 | 1 | 203810763 | C | T | 0.2754 | 0.0144 | 0.0021 | 7.89E-12 |
| rs61944841 | 13 | 27049616 | A | G | 0.4138 | 0.0253 | 0.002 | 3.54E-37 |
| rs62033029 | 16 | 50107273 | A | G | 0.2064 | -0.0141 | 0.0023 | 1.73E-09 |
| rs62070319 | 16 | 89573216 | T | C | 0.4427 | -0.018 | 0.002 | 2.54E-20 |
| rs62103240 | 18 | 77650637 | A | G | 0.071 | 0.0212 | 0.0037 | 1.40E-08 |
| rs62143873 | 2 | 72035050 | A | G | 0.5033 | -0.0115 | 0.0019 | 1.19E-09 |
| rs6425817 | 1 | 33873034 | G | A | 0.6724 | 0.0157 | 0.002 | 2.98E-15 |
| rs6502935 | 17 | 1650168 | T | C | 0.7381 | -0.0125 | 0.0022 | 6.31E-09 |
| rs655113 | 6 | 52269151 | C | T | 0.3006 | 0.0188 | 0.0021 | 7.42E-20 |
| rs6582398 | 12 | 42870444 | T | C | 0.6002 | 0.014 | 0.002 | 1.14E-12 |
| rs6593210 | 7 | 55254186 | A | G | 0.2081 | 0.0146 | 0.0024 | 4.88E-10 |
| rs664317 | 10 | 89812230 | C | A | 0.8375 | -0.0177 | 0.0026 | 4.50E-12 |
| rs68049170 | 10 | 72432047 | A | G | 0.2764 | -0.0259 | 0.0021 | 2.69E-34 |
| rs680882 | 7 | 18325278 | G | T | 0.7606 | 0.0133 | 0.0022 | 1.98E-09 |
| rs684905 | 20 | 10472790 | T | C | 0.4176 | -0.0118 | 0.0019 | 7.10E-10 |
| rs700677 | 2 | 198702424 | A | C | 0.3505 | 0.0173 | 0.002 | 1.13E-18 |
| rs7014590 | 8 | 89335647 | C | T | 0.2614 | -0.0228 | 0.0022 | 4.48E-26 |
| rs71414738 | 2 | 127876242 | T | C | 0.1763 | 0.015 | 0.0025 | 1.00E-09 |
| rs7144307 | 14 | 69533837 | C | T | 0.3853 | -0.0122 | 0.002 | 6.10E-10 |
| rs7185244 | 16 | 86546887 | C | T | 0.7759 | -0.0148 | 0.0023 | 1.40E-10 |
| rs718603 | 6 | 2644245 | T | C | 0.2774 | 0.0131 | 0.0021 | 6.68E-10 |
| rs7220127 | 17 | 64545922 | C | T | 0.4264 | -0.0105 | 0.0019 | 4.60E-08 |
| rs7228151 | 18 | 57181694 | C | T | 0.206 | -0.0185 | 0.0023 | 3.19E-15 |
| rs72809820 | 2 | 97360079 | T | C | 0.324 | -0.0111 | 0.002 | 3.13E-08 |
| rs72829852 | 17 | 46633974 | T | C | 0.0621 | 0.0309 | 0.0039 | 3.74E-15 |
| rs7286917 | 22 | 39860868 | G | A | 0.7461 | 0.0171 | 0.0023 | 5.18E-14 |
| rs73006226 | 11 | 108072728 | A | C | 0.1267 | -0.0182 | 0.0029 | 2.23E-10 |
| rs7328187 | 13 | 74189974 | G | T | 0.4976 | 0.0116 | 0.0019 | 1.19E-09 |
| rs73384223 | 9 | 3869315 | C | T | 0.1967 | -0.0205 | 0.0024 | 1.27E-17 |
| rs73413540 | 11 | 3090976 | T | C | 0.2248 | -0.0124 | 0.0023 | 4.42E-08 |
| rs7367519 | 1 | 204479176 | C | T | 0.6846 | 0.0164 | 0.002 | 4.68E-16 |
| rs73856768 | 4 | 157788804 | C | T | 0.0805 | -0.0247 | 0.0035 | 1.55E-12 |
| rs74379684 | 15 | 94050205 | T | C | 0.0751 | -0.0272 | 0.0036 | 4.39E-14 |
| rs74494415 | 18 | 74972138 | T | C | 0.0398 | -0.0417 | 0.0049 | 1.82E-17 |
| rs7485647 | 12 | 131631133 | A | G | 0.844 | -0.0261 | 0.0026 | 1.04E-23 |
| rs75022676 | 2 | 60293216 | A | G | 0.2079 | -0.0163 | 0.0023 | 2.84E-12 |
| rs7522400 | 1 | 36613380 | G | A | 0.7683 | 0.0129 | 0.0022 | 5.62E-09 |
| rs7543202 | 1 | 73872885 | G | A | 0.6229 | 0.0129 | 0.0019 | 2.86E-11 |
| rs75702986 | 19 | 35566151 | A | G | 0.1861 | -0.0163 | 0.0025 | 3.14E-11 |
| rs7679276 | 4 | 146860186 | G | A | 0.9544 | -0.033 | 0.0048 | 5.93E-12 |
| rs772222 | 12 | 52356892 | G | A | 0.2651 | 0.0121 | 0.0021 | 1.55E-08 |
| rs7731023 | 5 | 36181627 | G | A | 0.5749 | 0.0166 | 0.0019 | 3.48E-18 |
| rs77364196 | 16 | 88353016 | A | G | 0.053 | -0.033 | 0.0043 | 8.35E-15 |
| rs7816345 | 8 | 36846109 | T | C | 0.1682 | 0.0255 | 0.0025 | 6.22E-24 |
| rs781669 | 4 | 57819794 | T | C | 0.5236 | 0.0164 | 0.0019 | 3.14E-18 |
| rs7826059 | 8 | 22512068 | C | T | 0.6421 | 0.0114 | 0.002 | 7.61E-09 |
| rs78457529 | 16 | 24950880 | T | C | 0.0117 | -0.0904 | 0.0088 | 1.22E-24 |
| rs7902 | 11 | 95565288 | G | A | 0.4469 | 0.0149 | 0.0019 | 5.22E-15 |
| rs8000973 | 13 | 100691367 | C | T | 0.5334 | 0.0134 | 0.0019 | 2.05E-12 |
| rs80132799 | 20 | 62322896 | T | C | 0.0679 | 0.0231 | 0.0038 | 1.31E-09 |
| rs8017006 | 14 | 42745052 | G | A | 0.3275 | 0.0122 | 0.002 | 2.22E-09 |
| rs8018486 | 14 | 39818616 | G | A | 0.1914 | -0.0138 | 0.0024 | 1.18E-08 |
| rs8020095 | 14 | 67453858 | A | G | 0.15 | -0.0145 | 0.0027 | 4.53E-08 |
| rs80280630 | 9 | 117030861 | T | C | 0.1115 | -0.0168 | 0.003 | 2.28E-08 |
| rs8054549 | 16 | 86417234 | A | C | 0.4486 | -0.0251 | 0.0019 | 3.37E-39 |
| rs8904 | 14 | 35871217 | A | G | 0.363 | -0.0157 | 0.002 | 1.52E-15 |
| rs909220 | 14 | 75908780 | A | G | 0.4443 | -0.015 | 0.0019 | 3.24E-15 |
| rs9590328 | 13 | 96448383 | G | A | 0.1417 | 0.0153 | 0.0027 | 2.02E-08 |
| rs9594714 | 13 | 42800481 | T | G | 0.3052 | 0.0144 | 0.0021 | 2.65E-12 |
| rs9610447 | 22 | 20768891 | T | C | 0.7471 | 0.0152 | 0.0022 | 5.29E-12 |
| rs9636364 | 2 | 111992435 | A | G | 0.5429 | 0.011 | 0.0019 | 5.09E-09 |
| rs9832919 | 3 | 132184526 | G | A | 0.3574 | -0.0179 | 0.002 | 7.90E-20 |
| rs9838614 | 3 | 38537671 | G | T | 0.3881 | -0.0185 | 0.0019 | 1.21E-21 |
| rs987666 | 7 | 116267938 | A | G | 0.1188 | 0.0185 | 0.0029 | 2.33E-10 |
| rs990315 | 15 | 69578811 | C | T | 0.6229 | -0.0115 | 0.002 | 5.07E-09 |
| Abbreviations: SNP, single-nucleotide polymorphism; chr, chromosome; EA, effect allele; OA, other allele; eaf, effect allele frequency. | | | | | | | | |

| **Supplementary Table S15.** Details of instrument variables used for low grip strength in reverse MR analyses | | | | | | | | |
| --- | --- | --- | --- | --- | --- | --- | --- | --- |
| SNP | chr | Position | EA | OA | eaf | beta | se | *P*-value |
| rs10846071 | 12 | 15016236 | T | C | 0.3917 | 0.0433 | 0.0075 | 7.32E-09 |
| rs143459567 | 16 | 24600412 | T | C | 0.0386 | 0.1185 | 0.0189 | 3.41E-10 |
| Abbreviations: SNP, single-nucleotide polymorphism; chr, chromosome; EA, effect allele; OA, other allele; eaf, effect allele frequency. | | | | | | | | |

| **Supplementary Table S16.** Details of instrument variables used for walking pace in reverse MR analyses | | | | | | | | |
| --- | --- | --- | --- | --- | --- | --- | --- | --- |
| SNP | chr | Position | EA | OA | eaf | beta | se | *P*-value |
| rs10862220 | 12 | 81430599 | G | T | 0.674897 | 0.0084 | 0.0014 | 4.80E-10 |
| rs10883618 | 10 | 103117653 | A | G | 0.372248 | 0.0078 | 0.0013 | 2.40E-09 |
| rs11077815 | 17 | 74389890 | C | T | 0.623657 | -0.0071 | 0.0013 | 4.80E-08 |
| rs11152989 | 6 | 96936061 | T | C | 0.312264 | -0.0075 | 0.0014 | 3.90E-08 |
| rs11682482 | 2 | 226486479 | G | T | 0.680801 | 0.0080 | 0.0014 | 3.30E-09 |
| rs11732213 | 4 | 1704244 | C | T | 0.195605 | 0.0092 | 0.0016 | 9.40E-09 |
| rs11848096 | 14 | 100969235 | C | T | 0.386669 | -0.0075 | 0.0013 | 9.20E-09 |
| rs144333966 | 4 | 61109385 | G | A | 0.014646 | 0.0305 | 0.0054 | 2.20E-08 |
| rs2037735 | 19 | 48012469 | T | C | 0.120628 | -0.0113 | 0.0019 | 6.70E-09 |
| rs2170670 | 12 | 16944621 | A | G | 0.606925 | -0.0071 | 0.0013 | 4.70E-08 |
| rs2645979 | 12 | 84017043 | A | G | 0.357204 | 0.0086 | 0.0013 | 6.70E-11 |
| rs4109292 | 10 | 126710654 | A | G | 0.493943 | 0.0074 | 0.0013 | 6.60E-09 |
| rs4839898 | 6 | 97546759 | A | G | 0.109786 | 0.01306 | 0.0021 | 2.30E-10 |
| rs7789719 | 7 | 66893916 | C | T | 0.782126 | 0.0085 | 0.0015 | 2.70E-08 |
| rs8010773 | 14 | 46956863 | C | T | 0.38208 | -0.0082 | 0.0013 | 3.40E-10 |
| rs8011870 | 14 | 80173397 | A | G | 0.288257 | -0.0078 | 0.0014 | 2.60E-08 |
| Abbreviations: SNP, single-nucleotide polymorphism; chr, chromosome; EA, effect allele; OA, other allele; eaf, effect allele frequency. | | | | | | | | |

| **Supplementary Table S17.** Results of reverse MR analyses | | | | | |
| --- | --- | --- | --- | --- | --- |
| Exposure | Outcome | nSNP | MR method | OR (95% CI) | *P*-value |
| ALM | SLE | 224 | IVW | 1.568 (0.846-2.907) | 0.1534 |
|  |  | 224 | Weighted median | 1.178 (0.516-2.686) | 0.6976 |
|  |  | 224 | MR-RAPS | 1.644 (0.872-3.101) | 0.1244 |
|  | RA | 224 | IVW | 1.034 (0.865-1.237) | 0.7103 |
|  |  | 224 | Weighted median | 1.000 (0.753-1.327) | 0.9985 |
|  |  | 224 | MR-RAPS | 1.047 (0.869-1.261) | 0.6310 |
|  | IBD | 224 | IVW | 0.999 (0.799-1.249) | 0.9938 |
|  |  | 224 | Weighted median | 1.142 (0.814-1.604) | 0.4419 |
|  |  | 224 | MR-RAPS | 1.009 (0.788-1.292) | 0.9424 |
|  | MS | 224 | IVW | 0.918 (0.609-1.384) | 0.6821 |
|  |  | 224 | Weighted median | 1.171 (0.638-2.149) | 0.6106 |
|  |  | 224 | MR-RAPS | 0.933 (0.606-1.434) | 0.7510 |
|  | T1D | 224 | IVW | 0.924 (0.694-1.230) | 0.5878 |
|  |  | 224 | Weighted median | 0.812 (0.522-1.264) | 0.3560 |
|  |  | 224 | MR-RAPS | 0.944 (0.686-1.298) | 0.7232 |
|  | OAD | 224 | IVW | 0.961 (0.865-1.067) | 0.4575 |
|  |  | 224 | Weighted median | 0.904 (0.794-1.030) | 0.1294 |
|  |  | 224 | MR-RAPS | 0.961 (0.868-1.063) | 0.4344 |
| Low grip strength | SLE | 2 | IVW | 3.069 (0.409-23.024) | 0.2754 |
|  |  | 2 | MR-RAPS | 3.073 (0.381-24.782) | 0.2918 |
|  | RA | 2 | IVW | 0.862 (0.453-1.638) | 0.6496 |
|  |  | 2 | MR-RAPS | 0.861 (0.442-1.675) | 0.6589 |
|  | IBD | 2 | IVW | 0.682 (0.306-1.519) | 0.3487 |
|  |  | 2 | MR-RAPS | 0.678 (0.292-1.572) | 0.3650 |
|  | MS | 2 | IVW | 1.454 (0.331-6.395) | 0.6202 |
|  |  | 2 | MR-RAPS | 1.462 (0.311-6.866) | 0.6306 |
|  | T1D | 2 | IVW | 1.165 (0.418-3.247) | 0.7707 |
|  |  | 2 | MR-RAPS | 1.165 (0.407-3.336) | 0.7765 |
|  | OAD | 2 | IVW | 0.938 (0.701-1.255) | 0.6665 |
|  |  | 2 | MR-RAPS | 0.862 (0.581-1.280) | 0.4624 |
| Walking pace | SLE | 16 | IVW | 1.059 (0.023-49.742) | 0.9767 |
|  |  | 16 | Weighted median | 2.588 (0.014-482.09) | 0.7214 |
|  |  | 16 | MR-RAPS | 1.193 (0.021-66.574) | 0.9315 |
|  | RA | 16 | IVW | 0.743 (0.218-2.534) | 0.6350 |
|  |  | 16 | Weighted median | 0.799 (0.142-4.483) | 0.7984 |
|  |  | 16 | MR-RAPS | 0.754 (0.208-2.730) | 0.6670 |
|  | IBD | 16 | IVW | 0.313 (0.067-1.454) | 0.1384 |
|  |  | 16 | Weighted median | 0.249 (0.028-2.211) | 0.2121 |
|  |  | 16 | MR-RAPS | 0.275 (0.051-1.478) | 0.1324 |
|  | MS | 16 | IVW | 0.082 (0.005-1.381) | 0.0825 |
|  |  | 16 | Weighted median | 0.040 (0.001-1.986) | 0.1061 |
|  |  | 16 | MR-RAPS | 0.065 (0.002-1.889) | 0.1117 |
|  | T1D | 16 | IVW | 0.608 (0.084-4.383) | 0.6218 |
|  |  | 16 | Weighted median | 0.440 (0.033-5.929) | 0.5362 |
|  |  | 16 | MR-RAPS | 0.494 (0.063-3.882) | 0.5026 |
|  | OAD | 16 | IVW | 0.572 (0.327-0.997) | 0.0489 |
|  |  | 16 | Weighted median | 0.549 (0.248-1.213) | 0.1379 |
|  |  | 16 | MR-RAPS | 0.581 (0.299-1.128) | 0.1086 |
| Abbreviations: ALM, appendicular lean mass; SLE, systemic lupus erythematosus; RA, rheumatoid arthritis; MS, multiple sclerosis; IBD, inflammatory bowel disease; T1D, type 1 diabetes; OAD, overall autoimmune disease; nSNP, number of single-nucleotide polymorphisms; MR, Mendelian randomization; IVW, inverse-variance-weighted; MR-RAPS, MR-robust adjusted profile score; OR, odds ratio; CI, confidence interval. | | | | | |


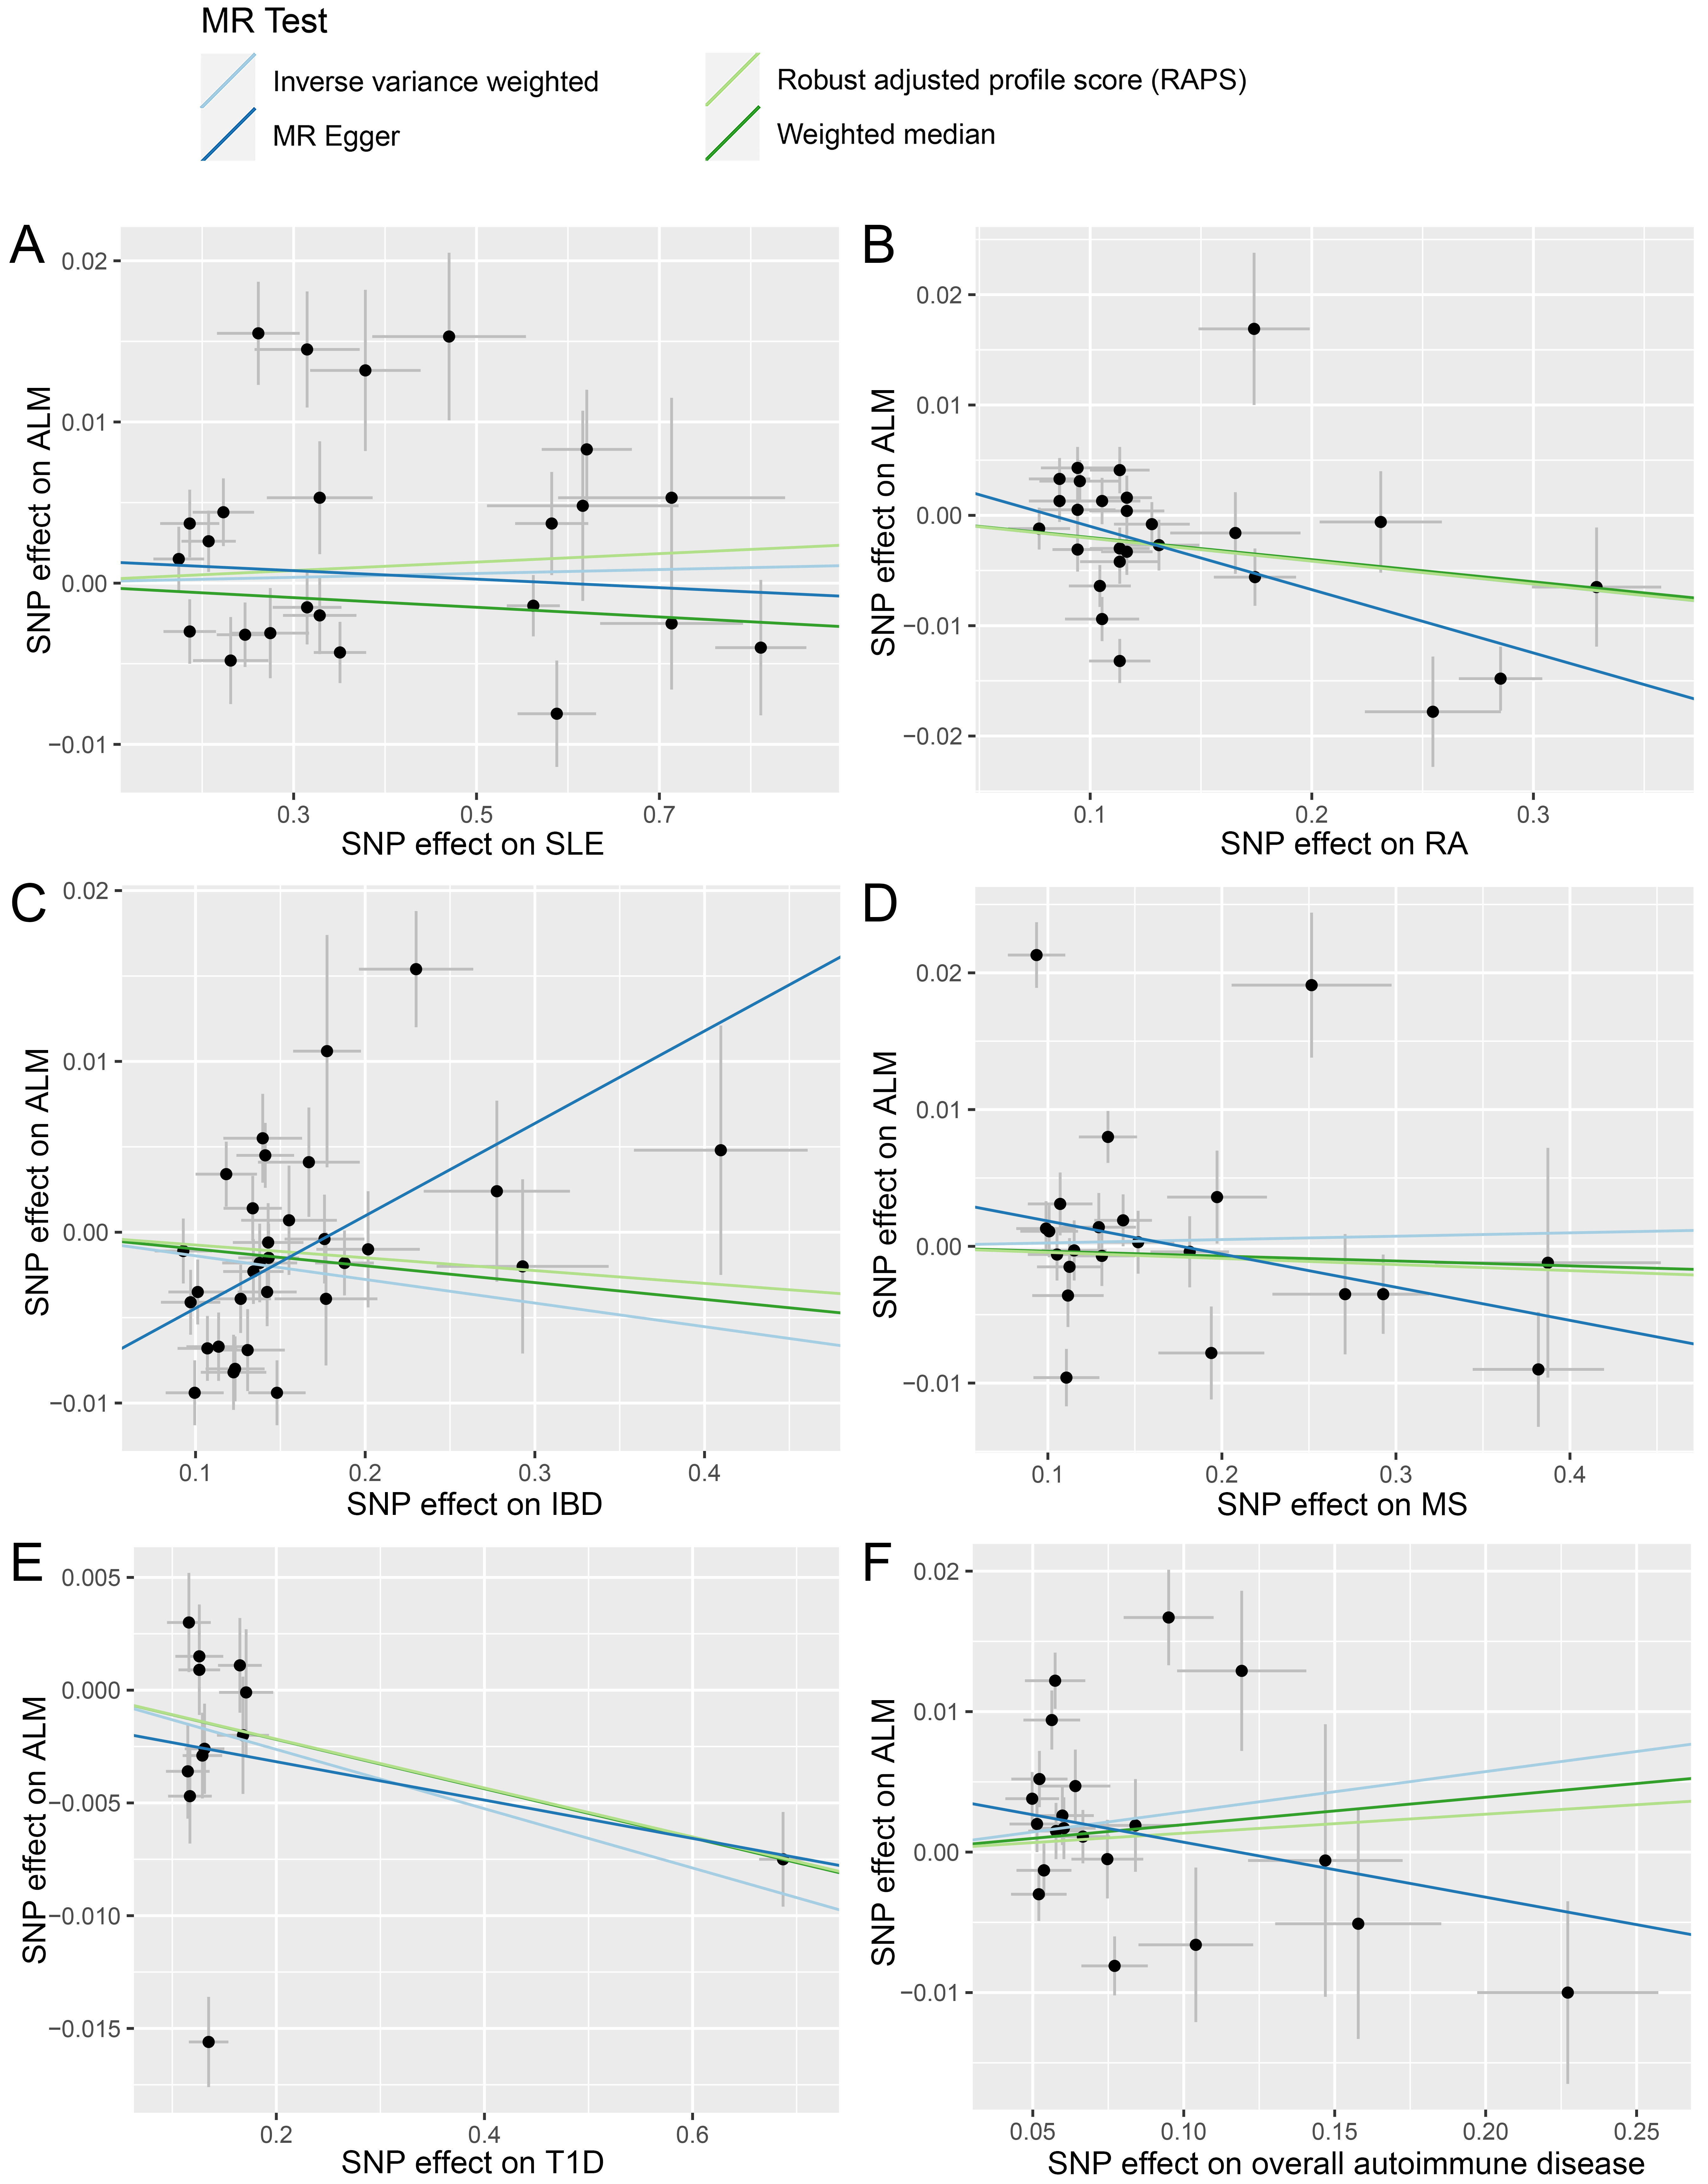


**Supplementary Figure S1.** The scatter plot for MR analysis of autoimmune diseases and appendicular lean mass. (A) SLE; (B) RA; (C) IBD; (D) MS; (E) T1D; (F) Overall autoimmune disease. Abbreviations: ALM, appendicular lean mass; SLE, systemic lupus erythematosus; RA, rheumatoid arthritis; MS, multiple sclerosis; IBD, inflammatory bowel disease; T1D, type 1 diabetes; SNP, single-nucleotide polymorphism.


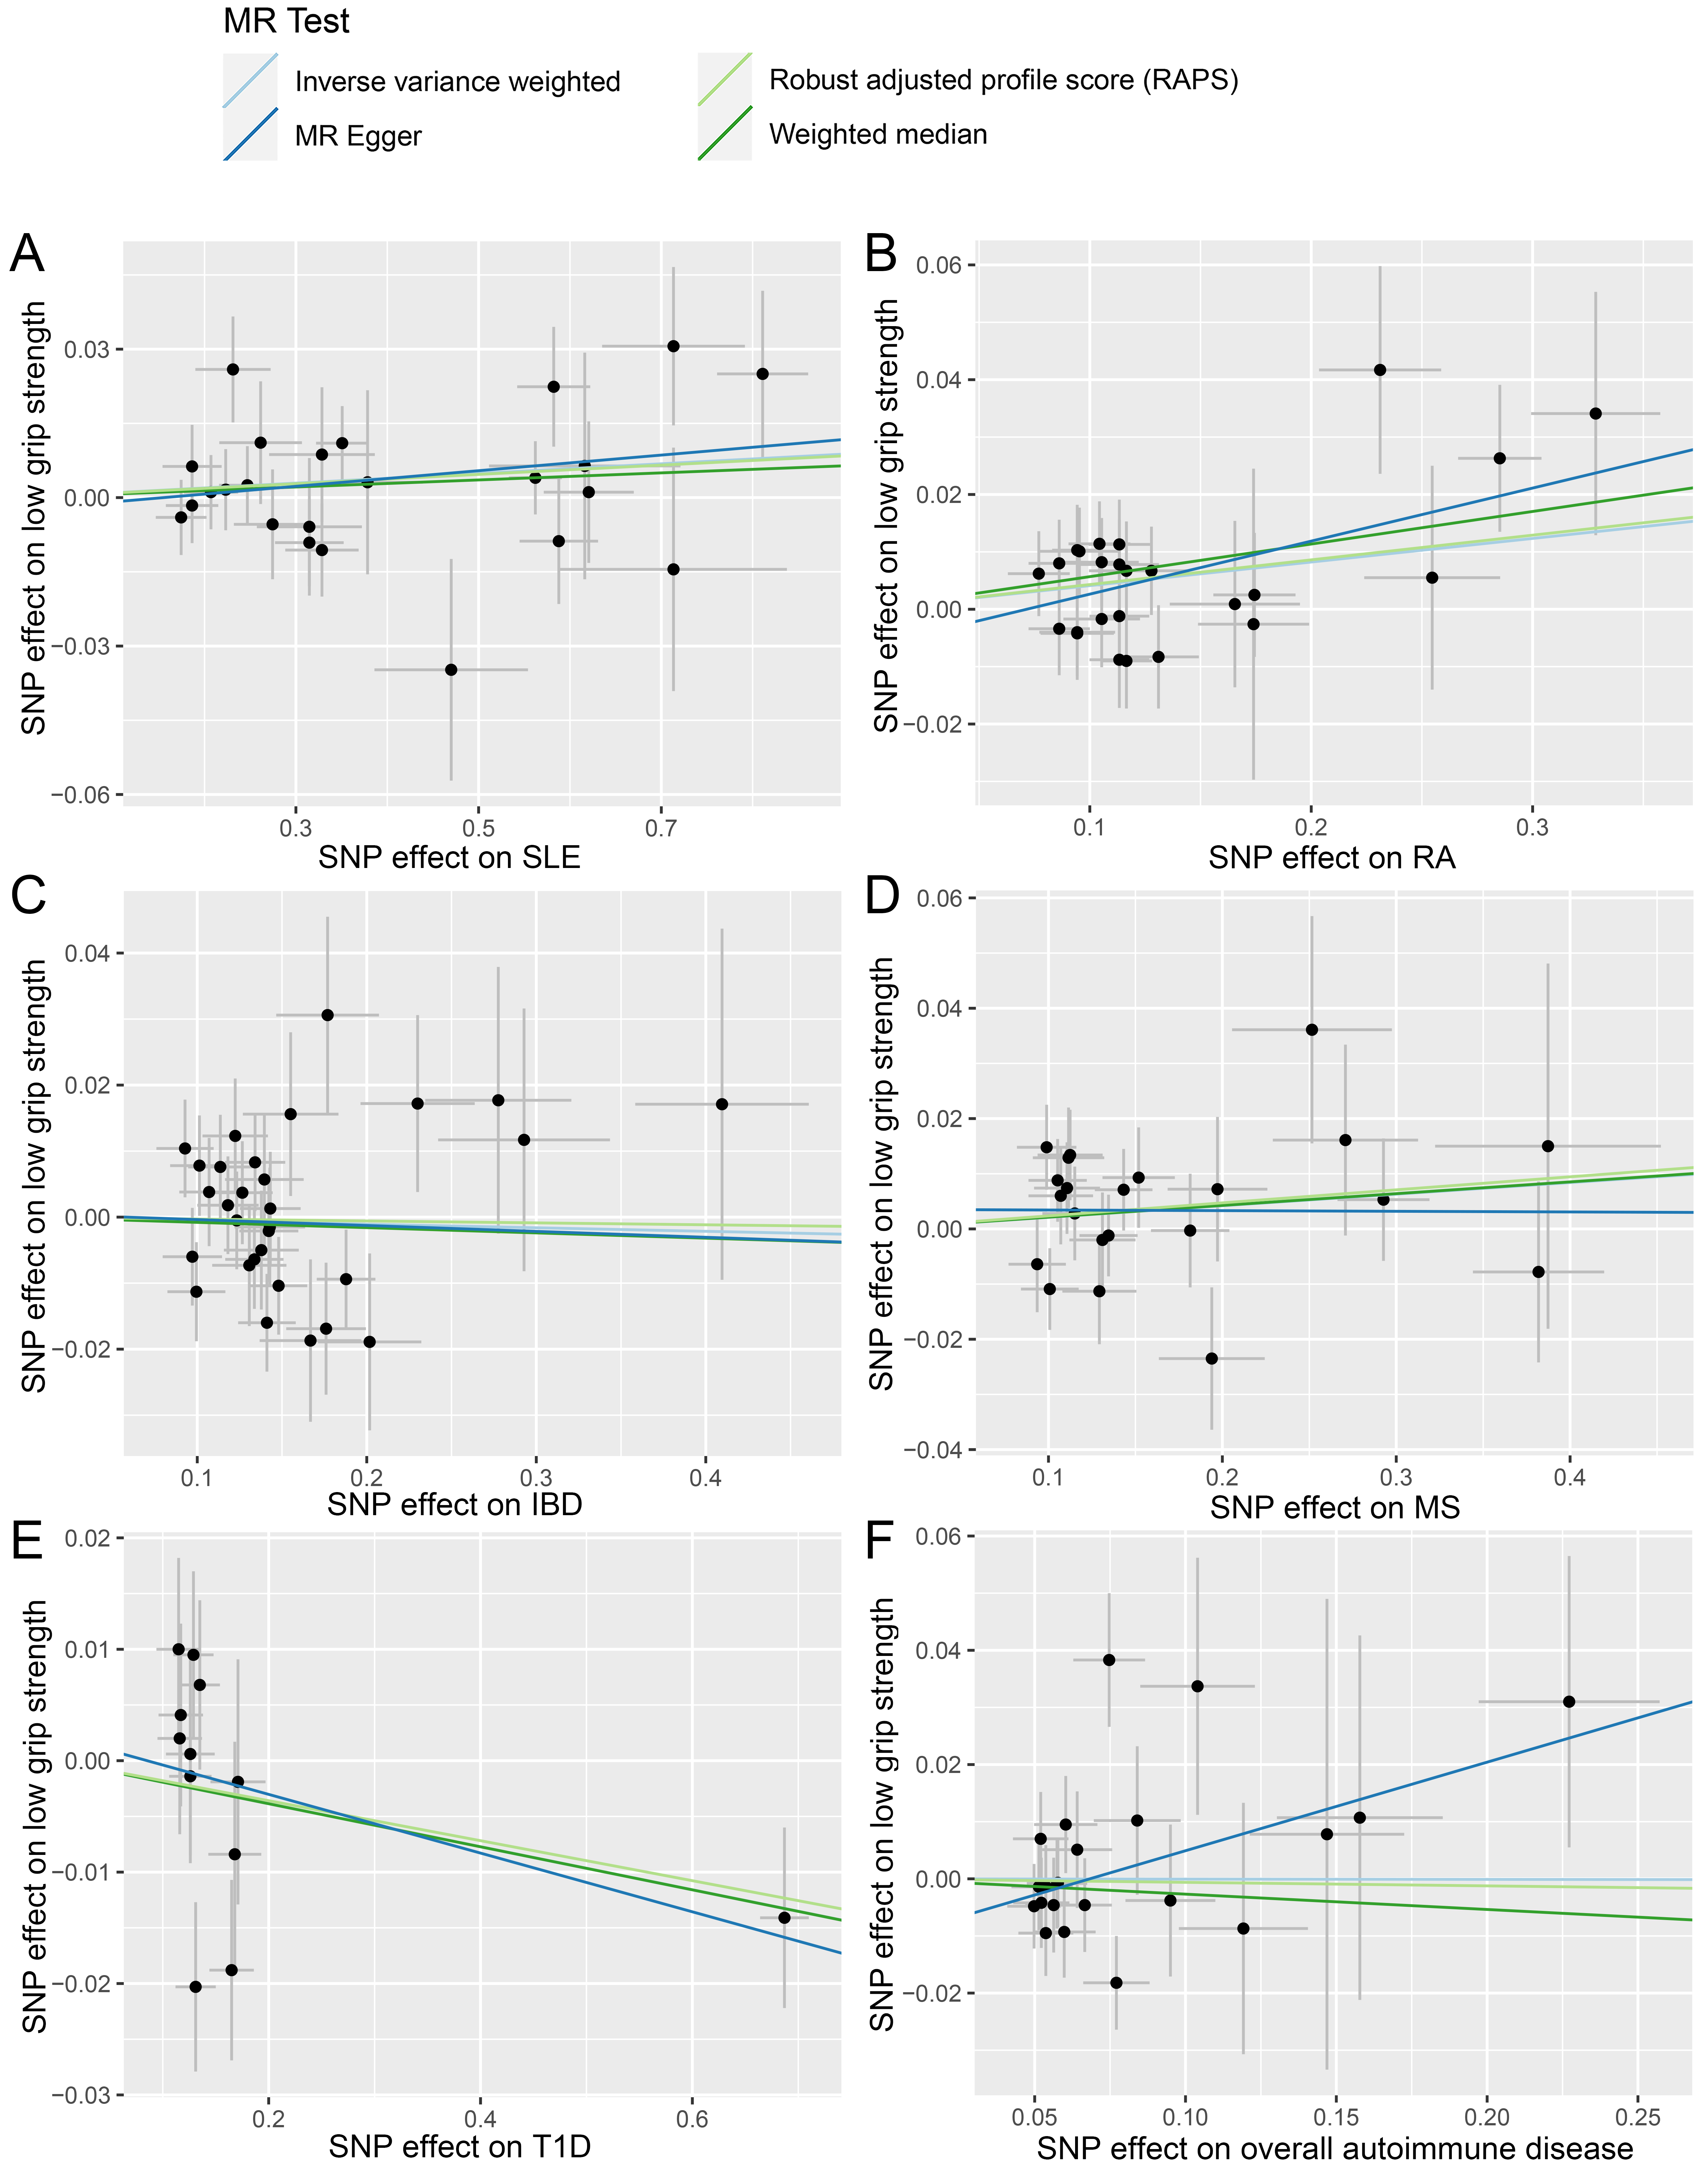


**Supplementary Figure S2.** The scatter plot for MR analysis of autoimmune diseases and low grip strength. (A) SLE; (B) RA; (C) IBD; (D) MS; (E) T1D; (F) Overall autoimmune disease. Abbreviations: SLE, systemic lupus erythematosus; RA, rheumatoid arthritis; MS, multiple sclerosis; IBD, inflammatory bowel disease; T1D, type 1 diabetes; SNP, single-nucleotide polymorphism.


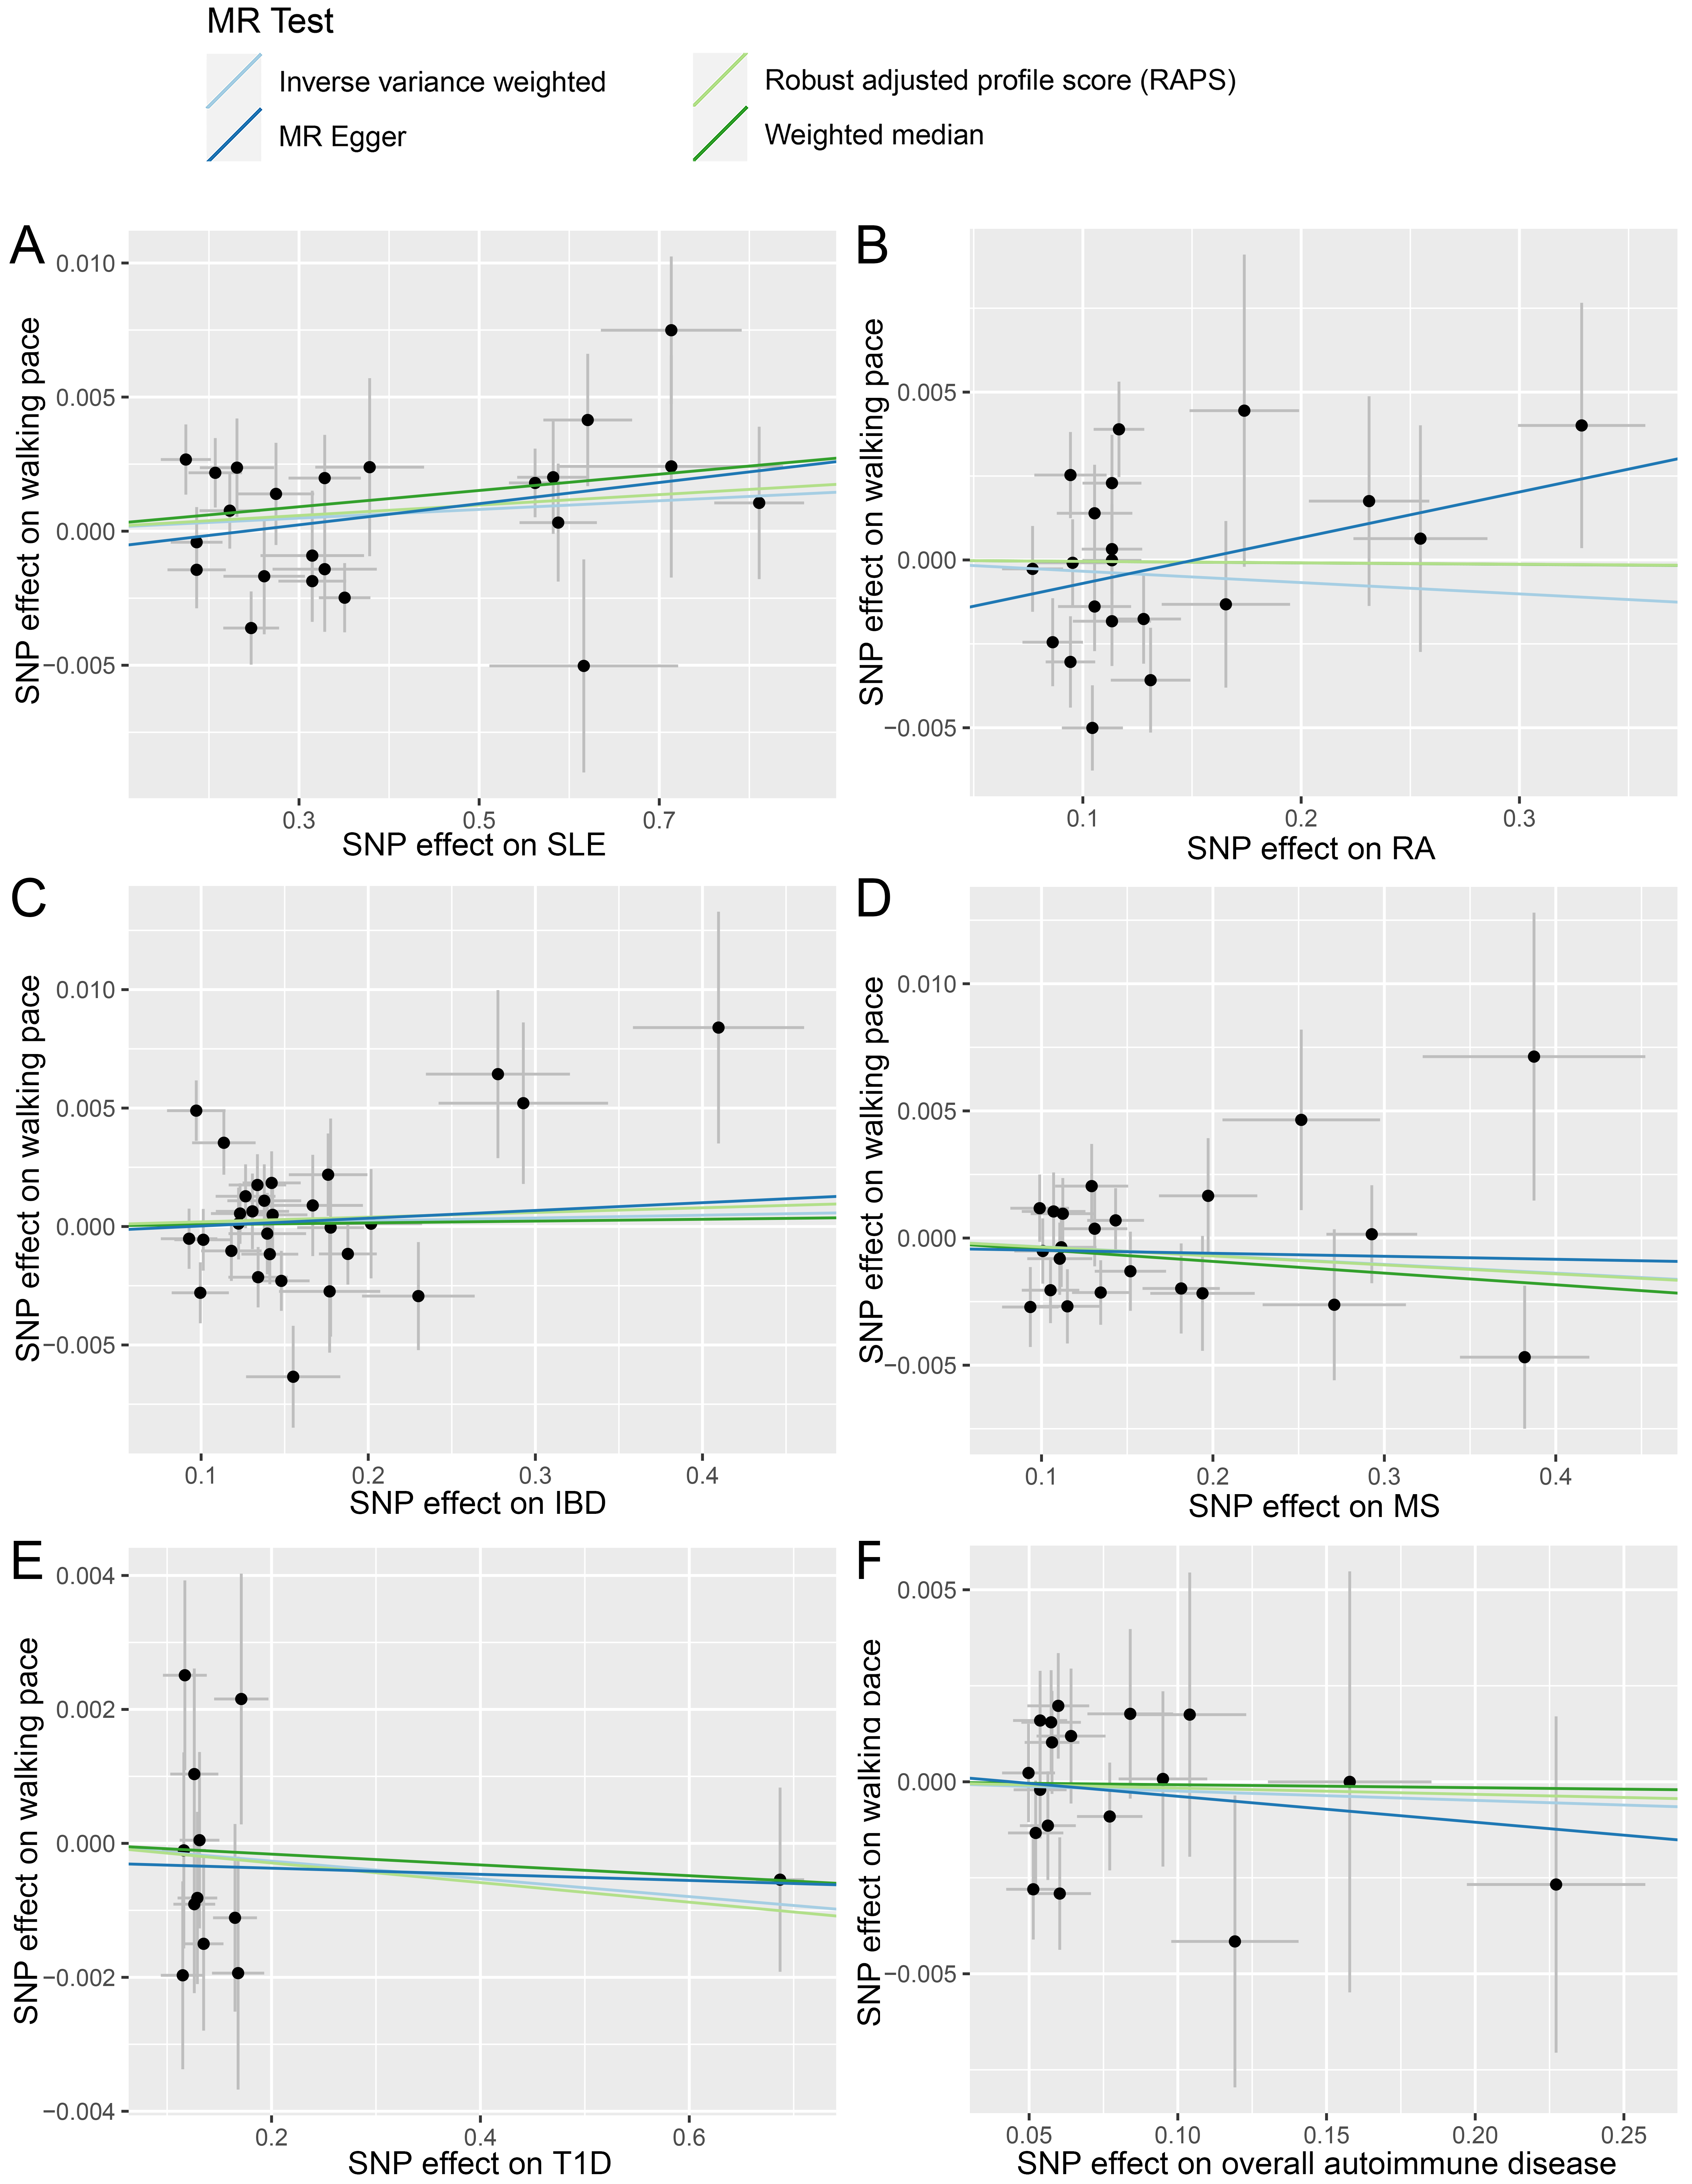


**Supplementary Figure S3.** The scatter plot for MR analysis of autoimmune diseases and walking pace. (A) SLE; (B) RA; (C) IBD; (D) MS; (E) T1D; (F) Overall autoimmune disease. Abbreviations: SLE, systemic lupus erythematosus; RA, rheumatoid arthritis; MS, multiple sclerosis; IBD, inflammatory bowel disease; T1D, type 1 diabetes; SNP, single-nucleotide polymorphism.
